# Supplementary material for: Plakilactones G and H from a marine sponge. Stereochemical determination of highly flexible systems by quantitative NMR-derived interproton distances combined with quantum mechanical calculations of 13C chemical shifts
Source: PubMed Central journal article supplement (PMC3896268; doi:10.3762/bjoc.9.331), 2013-12-30
Supplement: Beilstein_J_Org_Chem-09-2940-s001.pdf [file Beilstein_J_Org_Chem-09-2940-s001.pdf]

**Supporting Information**  
**for**  
**Plakilactones G and H from a marine sponge. Stereochemical**  
**determination of highly flexible systems by quantitative NMR-derived**  
**interproton distances combined with quantum mechanical**  
**calculations of <sup>13</sup>C chemical shifts**

Simone Di Micco<sup>1</sup>, Angela Zampella<sup>2</sup>, Maria Valeria D'Auria<sup>2</sup>, Carmen Festa<sup>2</sup>, Simona De  
Marino<sup>2</sup>, Raffaele Riccio<sup>1</sup>, Craig P. Butts<sup>3\*</sup> and Giuseppe Bifulco<sup>1\*</sup>

<sup>1</sup>Dipartimento di Farmacia, Università di Salerno, via Giovanni Paolo II 132, 84084 Fisciano (SA),  
Italy, <sup>2</sup>Dipartimento di Farmacia, Università di Napoli "Federico II", via D. Montesano 49, 80131  
Napoli, Italy and <sup>3</sup>Department of Chemistry, University of Bristol, Cantocks Close, BS8 1TS  
Bristol, United Kingdom

Email: Craig P. Butts - craig.butts@bristol.ac.uk; Giuseppe Bifulco - bifulco@unisa.it

## Analytical data

### Contents

- Figure S1.** <sup>1</sup>H NMR spectrum (500 MHz, CD<sub>3</sub>OD) of plakilactone G (**1**).
- Figure S2.** COSY spectrum (500 MHz, CD<sub>3</sub>OD) of plakilactone G (**1**).
- Figure S3.** HSQC spectrum (500 MHz, CD<sub>3</sub>OD) of plakilactone G (**1**).
- Figure S4.** HMBC spectrum (500 MHz, CD<sub>3</sub>OD) of plakilactone G (**1**).
- Figure S5.** <sup>1</sup>H NMR spectrum (500 MHz, CD<sub>3</sub>OD) of plakilactone H (**2**).
- Figure S6.** COSY spectrum (500 MHz, CD<sub>3</sub>OD) of plakilactone H (**2**).
- Figure S7.** HSQC spectrum (500 MHz, CD<sub>3</sub>OD) of plakilactone H (**2**).
- Figure S8.** HMBC spectrum (500 MHz, CD<sub>3</sub>OD) of plakilactone H (**2**).
- Table S1.** NMR Data of plakilactones G (**1**, 500 MHz, CDCl<sub>3</sub>) and H (**2**, 600 MHz, CDCl<sub>3</sub>)
- Figure S9.** <sup>1</sup>H NMR spectrum (500 MHz, CDCl<sub>3</sub>) of plakilactone G (**1**).
- Figure S10.** COSY spectrum (500 MHz, CDCl<sub>3</sub>) of plakilactone G (**1**).
- Figure S11.** HSQC spectrum (500 MHz, CDCl<sub>3</sub>) of plakilactone G (**1**).
- Figure S12.** HMBC spectrum (500 MHz, CDCl<sub>3</sub>) of plakilactone G (**1**).

**Figure S13.**  $^1\text{H}$  NMR spectrum (600 MHz,  $\text{CDCl}_3$ ) of plakilactone H (**2**).

**Figure S14.** COSY spectrum (600 MHz,  $\text{CDCl}_3$ ) of plakilactone H (**2**).

**Figure S15.** HSQC spectrum (600 MHz,  $\text{CDCl}_3$ ) of plakilactone H (**2**).

**Figure S16.** HMBC spectrum (600 MHz,  $\text{CDCl}_3$ ) of plakilactone H (**2**).

**Figure S17.** Selective 1D-NOESY spectrum (600 MHz,  $\text{CDCl}_3$ ) of Me16 of plakilactone H (**2**).

**Figure S18.** Selective 1D-NOESY spectrum (600 MHz,  $\text{CDCl}_3$ ) of Me12 of plakilactone H (**2**).

**Figure S19.** Selective 1D-NOESY spectrum (600 MHz,  $\text{CDCl}_3$ ) of H15a of plakilactone H (**2**).

**Figure S20.** Selective 1D-NOESY spectrum (600 MHz,  $\text{CDCl}_3$ ) of H15b of plakilactone H (**2**).

**Figure S21.** Selective 1D-NOESY spectrum (600 MHz,  $\text{CDCl}_3$ ) of H9 of plakilactone H (**2**).

**Figure S22.** Selective 1D-NOESY spectrum (600 MHz,  $\text{CDCl}_3$ ) of H13a of plakilactone H (**2**).

**Figure S23.** Selective 1D-NOESY spectrum (600 MHz,  $\text{CDCl}_3$ ) of H5b of plakilactone H (**2**).

**Figure S24.** Selective 1D-NOESY spectrum (600 MHz,  $\text{CDCl}_3$ ) of H11 of plakilactone H (**2**).

**Figure S25.** Selective 1D-NOESY spectrum (600 MHz,  $\text{CDCl}_3$ ) of H7 of plakilactone H (**2**).

**Figure S26.** Selective 1D-NOESY spectrum (600 MHz,  $\text{CDCl}_3$ ) of H8 of plakilactone H (**2**).

**Figure S27.** Selective 1D-NOESY spectrum (600 MHz,  $\text{CDCl}_3$ ) of H3 of plakilactone H (**2**).

**Table S2.** Experimental and calculated  $^{13}\text{C}$  chemical shifts values for **2a,b,e,f**.

**Table S3.** Experimental and calculated  $^{13}\text{C}$  chemical shifts values for **1a-d**.

**Figure S28.** Selective 1D-NOESY spectrum (500 MHz,  $\text{CDCl}_3$ ) of Me14 of plakilactone G (**1**).

**Figure S29.** Selective 1D-NOESY spectrum (500 MHz,  $\text{CDCl}_3$ ) of Me16 of plakilactone G (**1**).

**Figure S30.** Selective 1D-NOESY spectrum (500 MHz,  $\text{CDCl}_3$ ) of H9b of plakilactone G (**1**).

**Figure S31.** Selective 1D-NOESY spectrum (500 MHz,  $\text{CDCl}_3$ ) of H13b of plakilactone G (**1**).

**Figure S32.** Selective 1D-NOESY spectrum (500 MHz,  $\text{CDCl}_3$ ) of H5b of plakilactone G (**1**).

**Figure S33.** Selective 1D-NOESY spectrum (500 MHz,  $\text{CDCl}_3$ ) of H11 of plakilactone G (**1**).

**Figure S34.** Selective 1D-NOESY spectrum (500 MHz,  $\text{CDCl}_3$ ) of H3 of plakilactone G (**1**).

**Table S4.** Comparison of calculated and experimental inter-proton distances for plakilactone G (**1**).

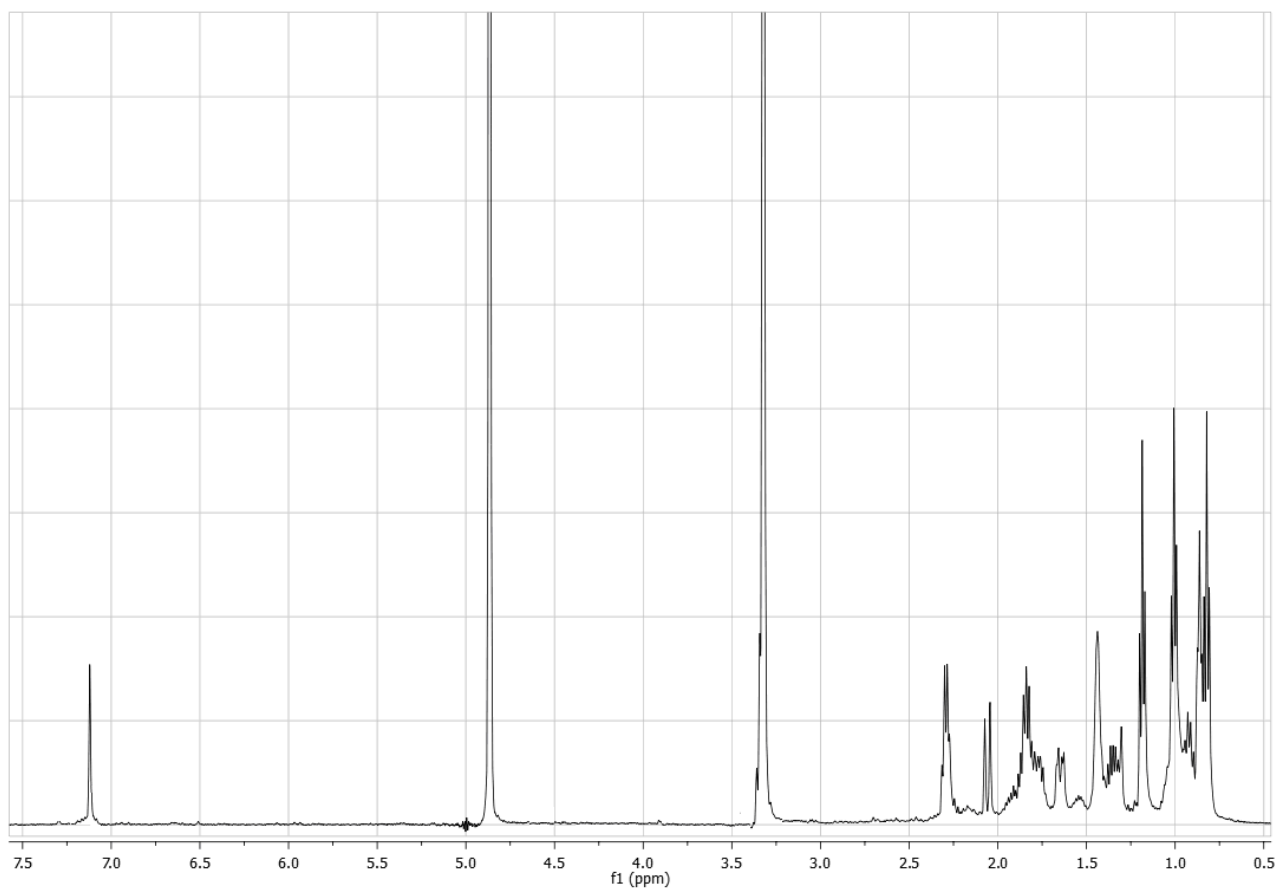

**Figure S1:**  $^1\text{H}$  NMR spectrum (500 MHz,  $\text{CD}_3\text{OD}$ ) of plakilactone G (**1**).

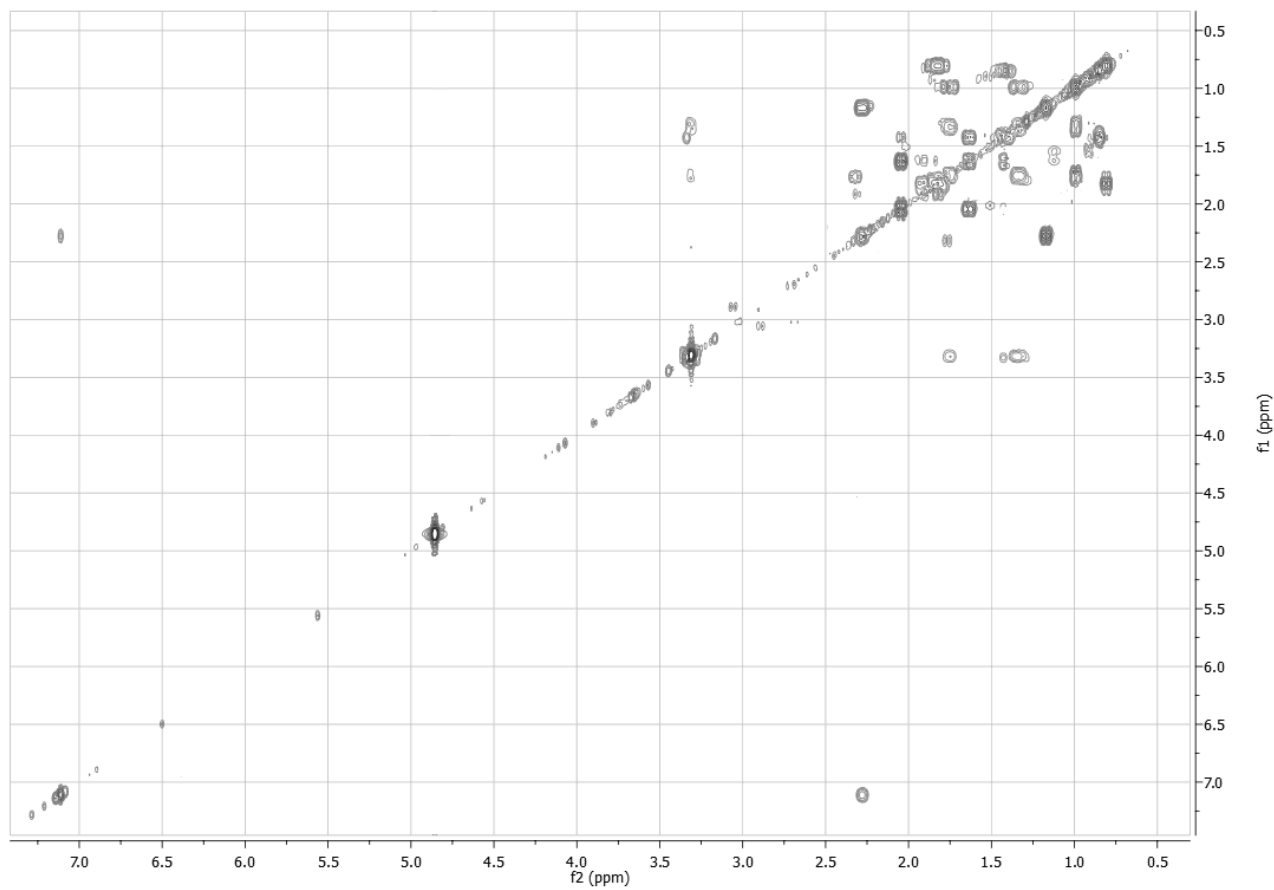

**Figure S2:** COSY spectrum (500 MHz, CD<sub>3</sub>OD) of plakilactone G (**1**).

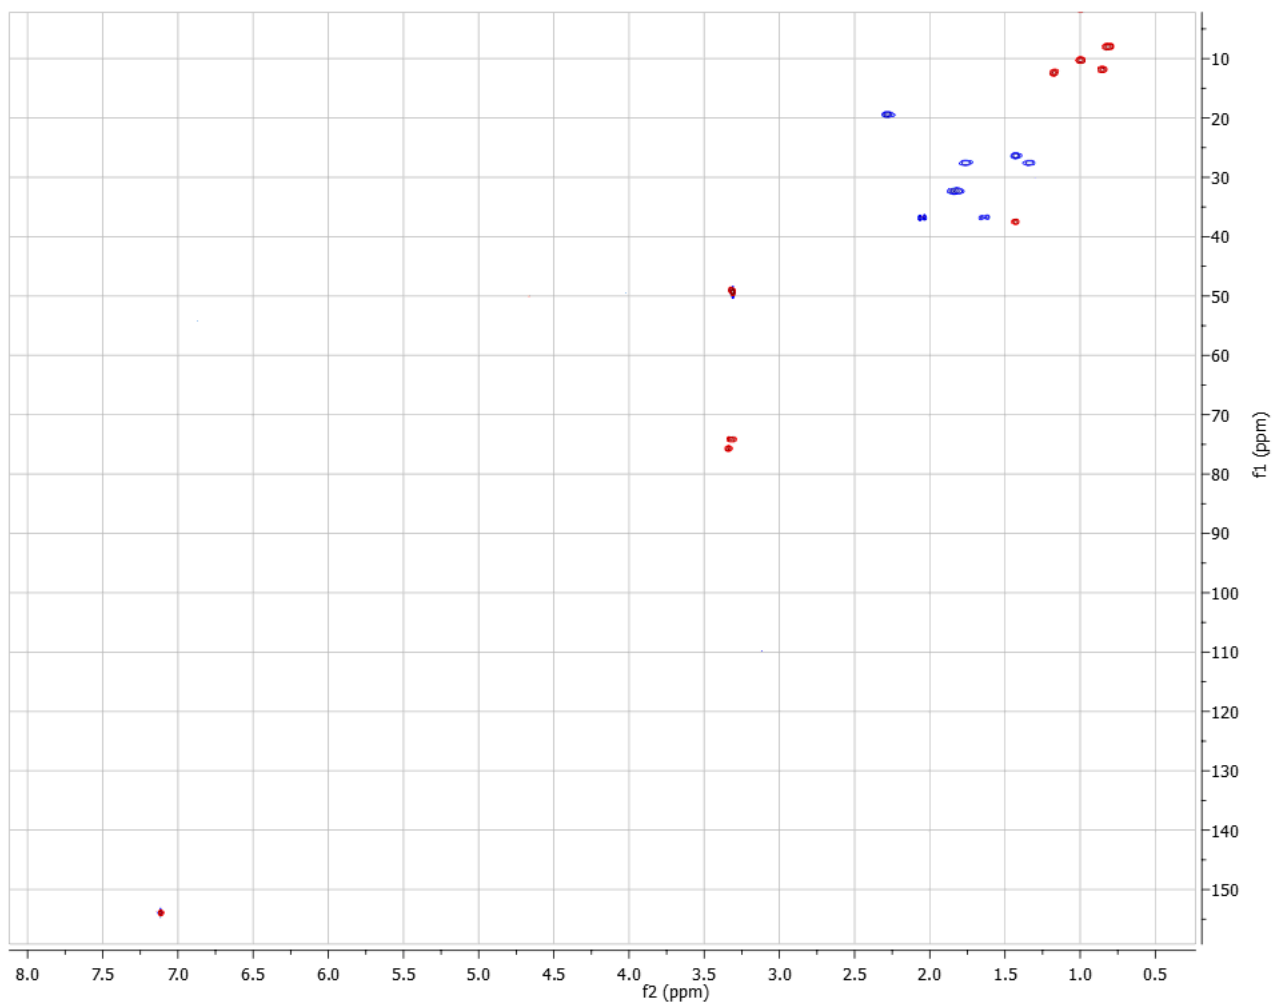

**Figure S3:** HSQC spectrum (500 MHz, CD<sub>3</sub>OD) of plakilactone G (**1**).

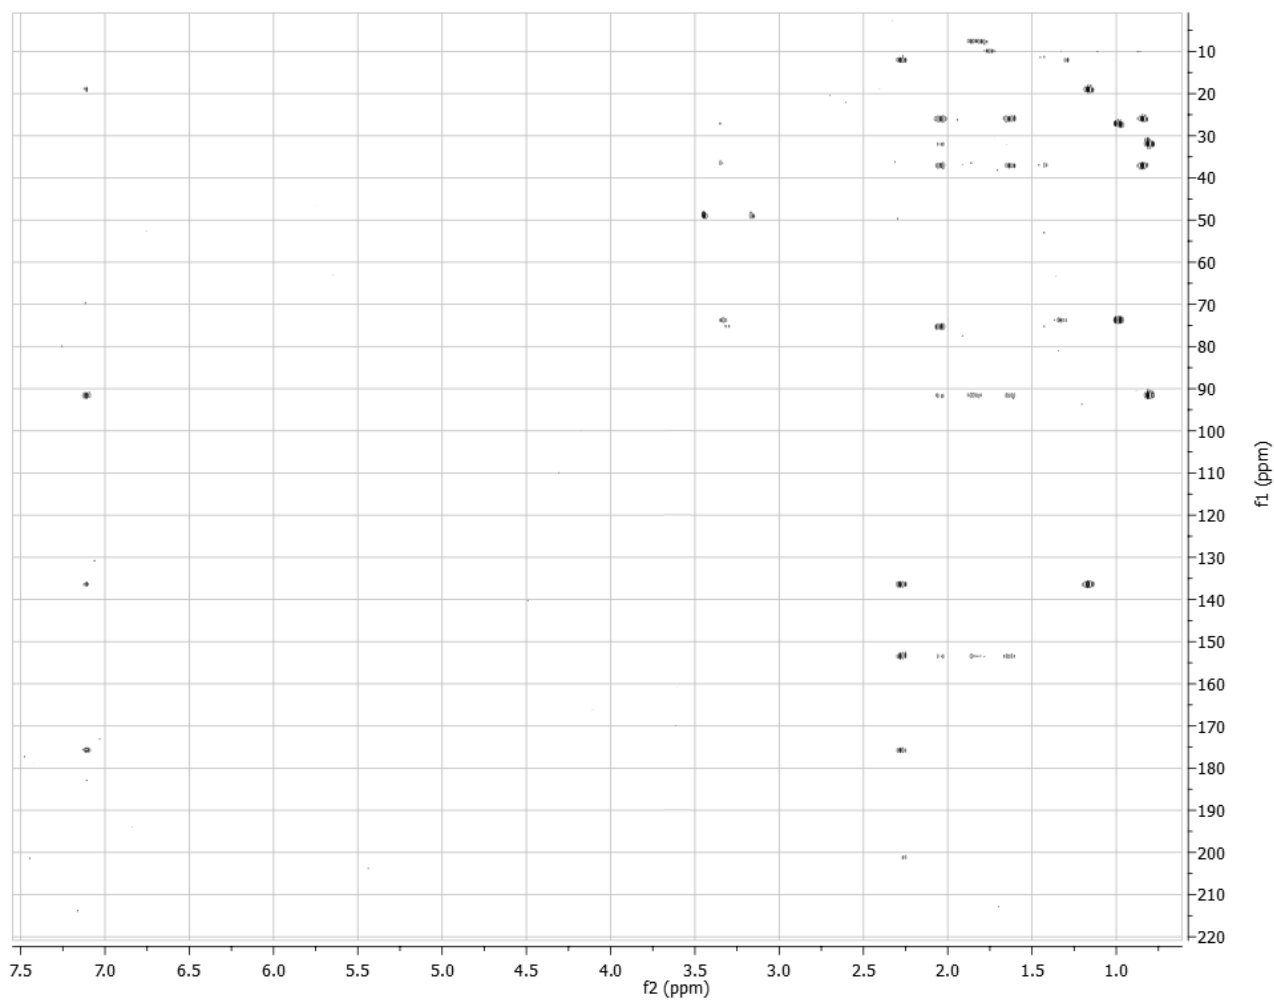

**Figure S4:** HMBC spectrum (500 MHz, CD<sub>3</sub>OD) of plakilactone G (**1**).

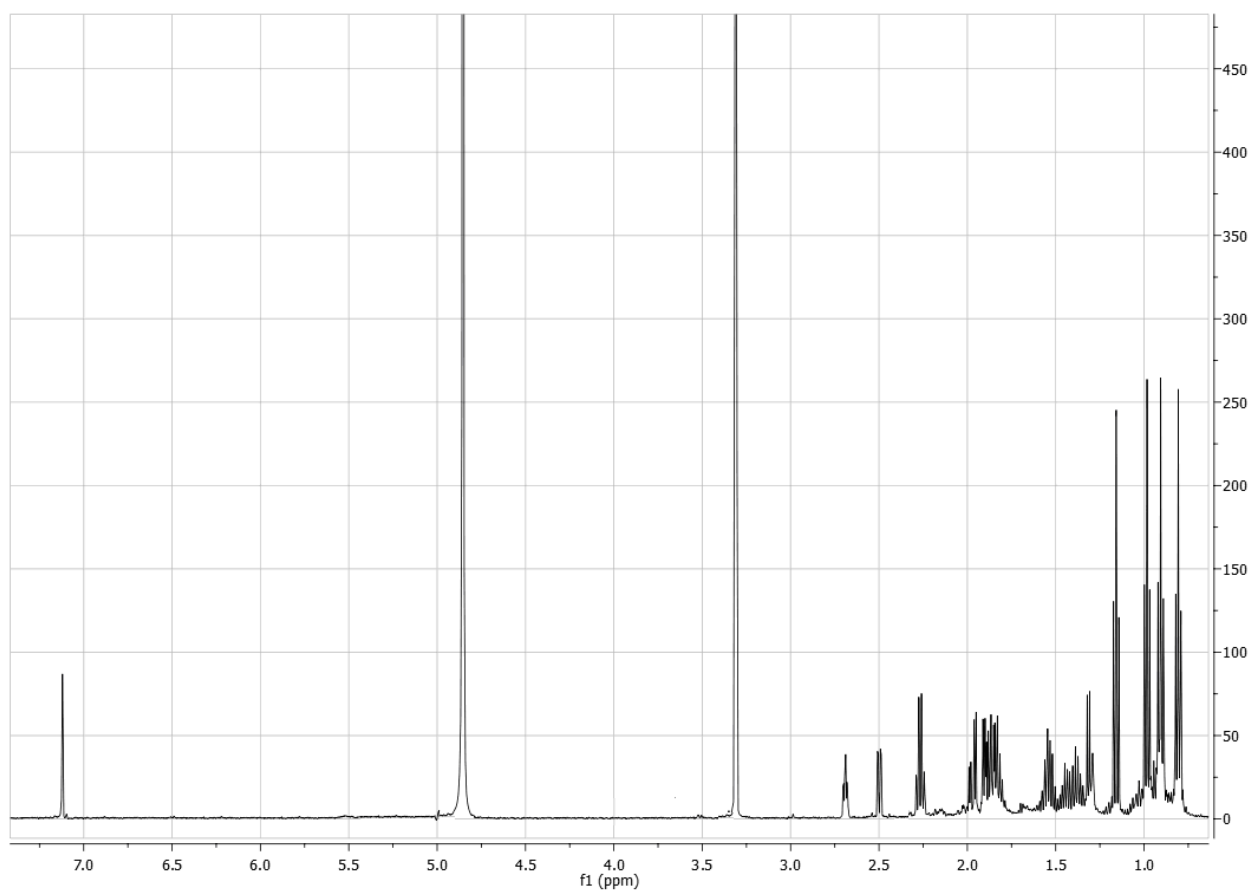

**Figure S5:**  $^1\text{H}$  NMR spectrum (500 MHz,  $\text{CD}_3\text{OD}$ ) of plakilactone H (**2**).

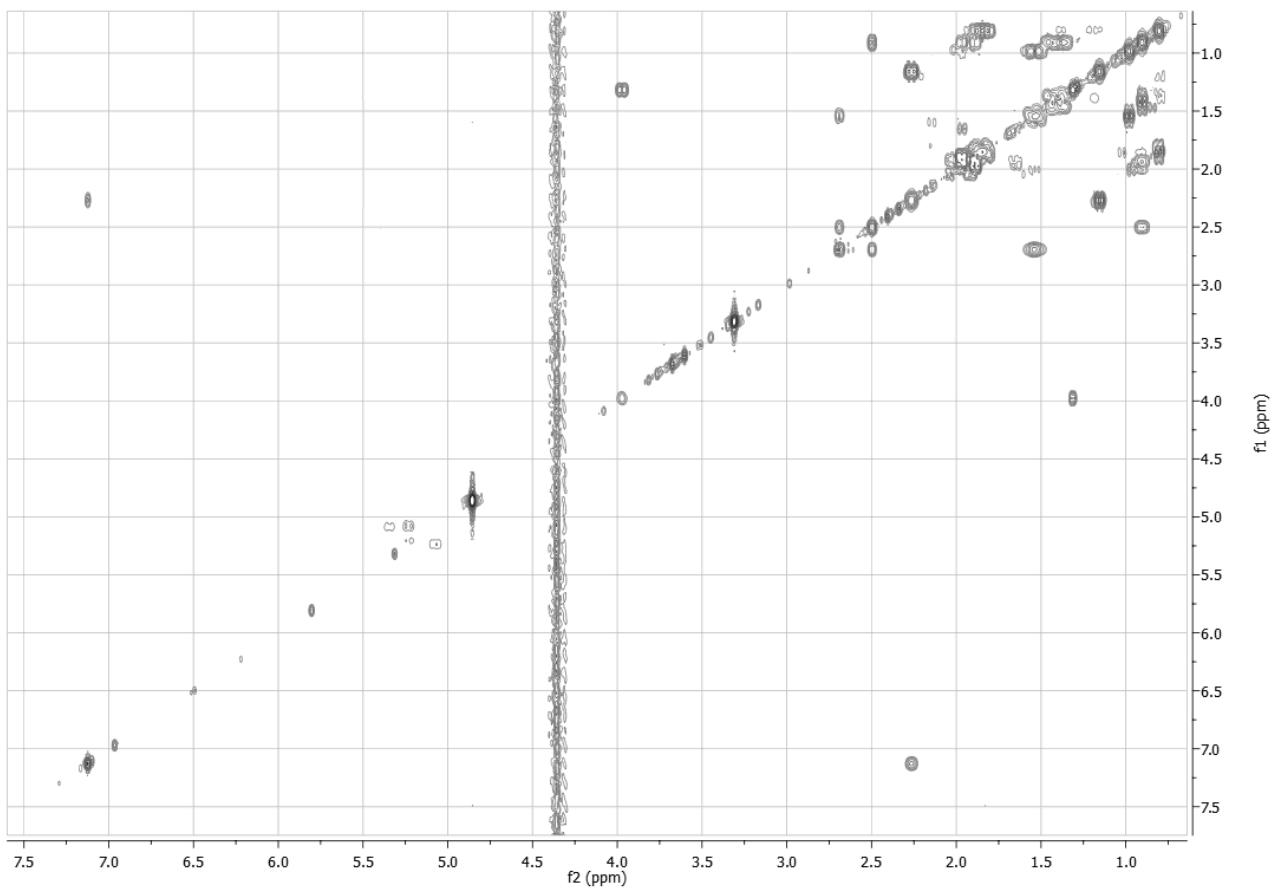

**Figure S6:** COSY spectrum (500 MHz, CD<sub>3</sub>OD) of plakilactone H (**2**).



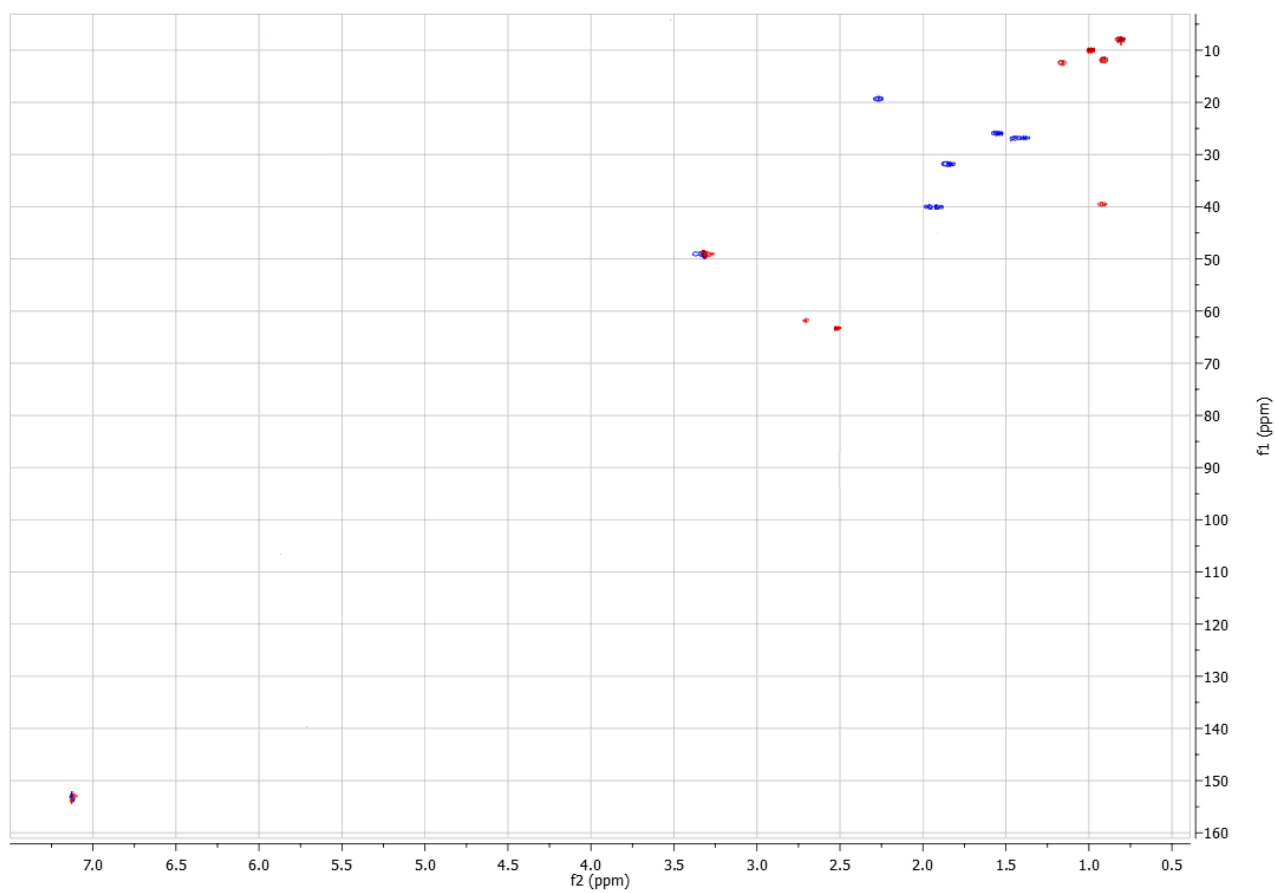

**Figure S7:** HSQC spectrum (500 MHz,  $\text{CD}_3\text{OD}$ ) of plakilactone H (**2**).

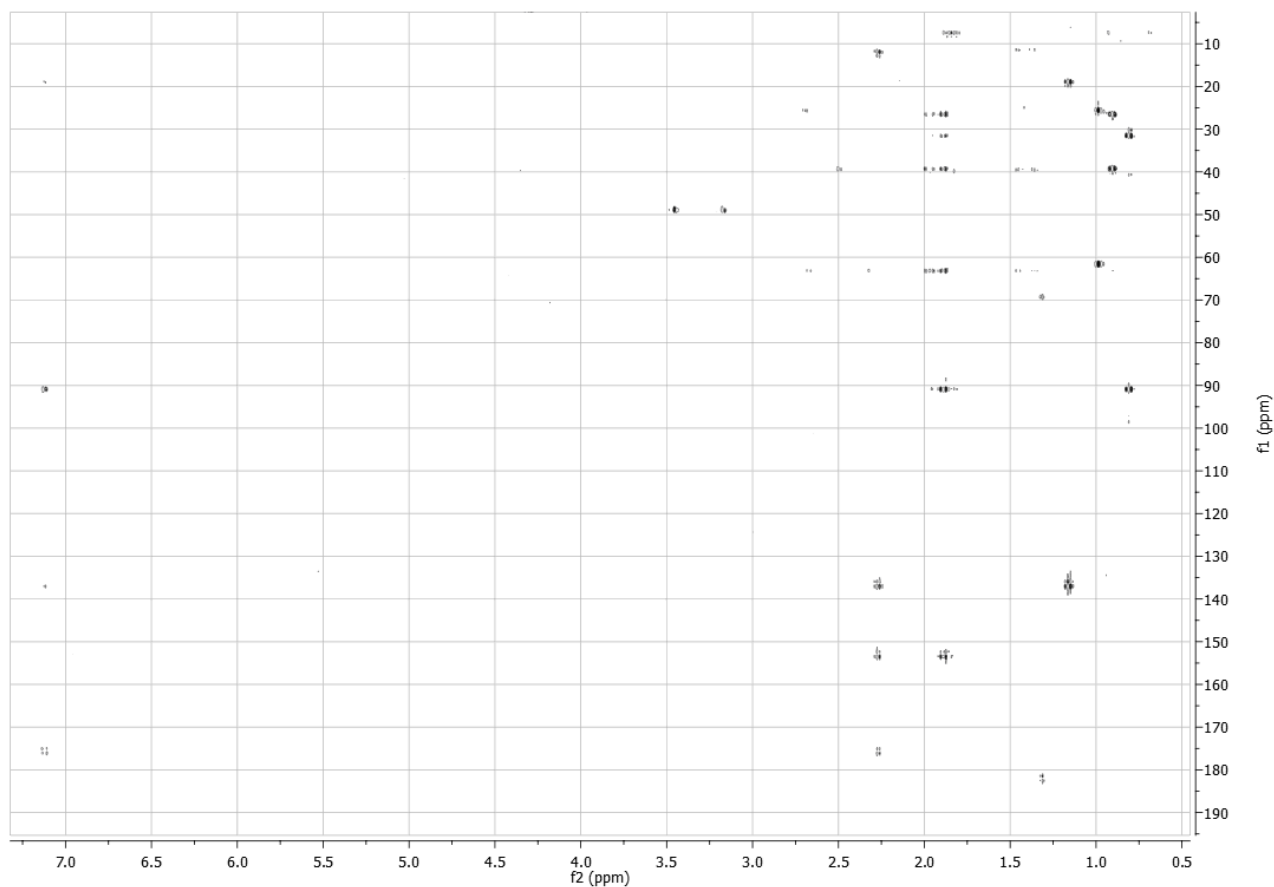

**Figure S8:** HMBC spectrum (500 MHz, CD<sub>3</sub>OD) of plakilactone H (**2**).

**Table S1:** NMR Data of plakilactones G (**1**, 500 MHz, CDCl<sub>3</sub>) and H (**2**, 600 MHz, CDCl<sub>3</sub>).

| position | <b>1</b>            |                     | <b>2</b>            |                     |
|----------|---------------------|---------------------|---------------------|---------------------|
|          | $\delta_{\text{H}}$ | $\delta_{\text{C}}$ | $\delta_{\text{H}}$ | $\delta_{\text{C}}$ |
| 1        | -                   | 173.1               | -                   | 173.6               |
| 2        | -                   | 135.5               | -                   | 136.1               |
| 3        | 6.87                | 151.0               | 6.86                | 150.2               |
| 4        | -                   |                     | -                   | 89.1                |
| 5        | 1.71<br>2.05        | 36.2                | 1.87<br>1.97        | 39.1                |
| 6        | 1.37                | 35.6                | 0.84                | 38.2                |
| 7        | 3.46                | 75.5                | 2.43                | 62.1                |
| 8        | 3.49                | 73.6                | 2.62                | 60.9                |
| 9        | 1.38<br>1.52        | 24.0                | 1.54                | 24.9                |
| 10       | 0.99                | 10.1                | 0.98                | 9.7                 |
| 11       | 2.32                | 18.5                | 1.14                | 18.3                |
| 12       | 1.15                | 12.1                | 2.29                | 11.8                |
| 13       | 1.72<br>1.86        | 30.9                | 1.76<br>1.86        | 31.2                |
| 14       | 0.81                | 7.9                 | 0.83                | 7.73                |
| 15       | 1.35                | 25.3                | 1.34<br>1.46        | 25.8                |
| 16       | 0.89                | 10.8                | 0.88                | 11.4                |

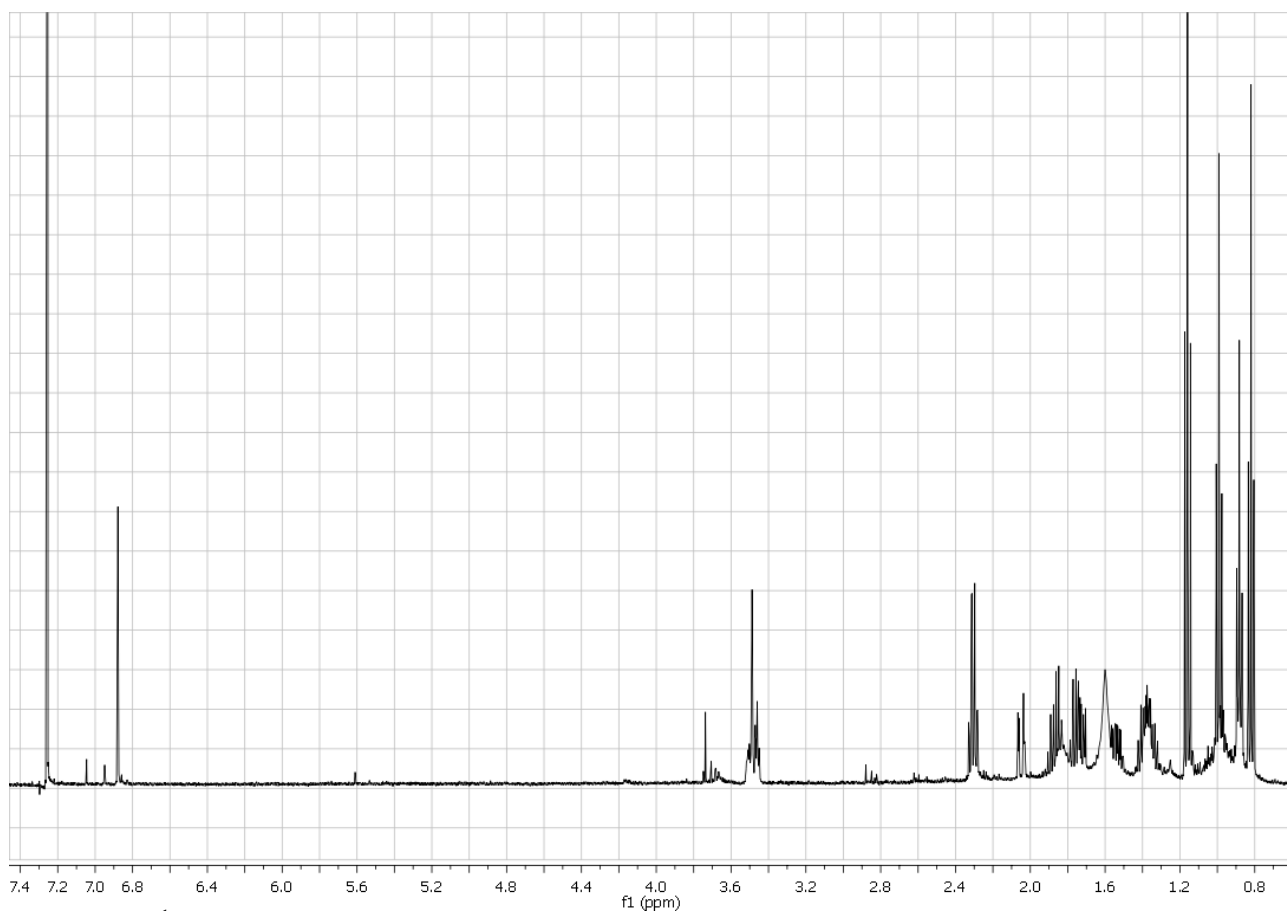

**Figure S9:**  $^1\text{H}$  NMR spectrum (500 MHz,  $\text{CDCl}_3$ ) of plakilactone G (**1**).

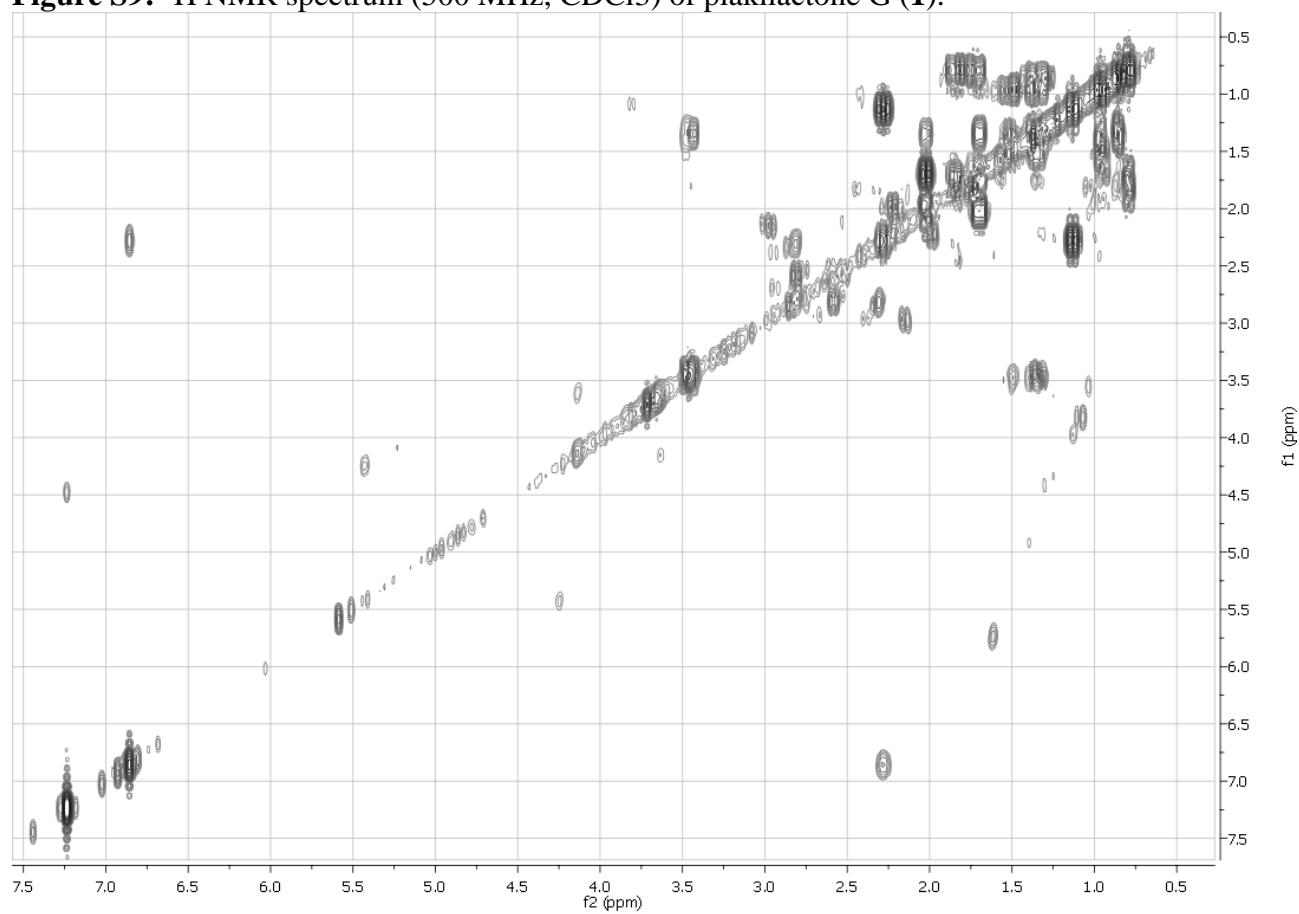

**Figure S10:** COSY spectrum (500 MHz,  $\text{CDCl}_3$ ) of plakilactone G (**1**).

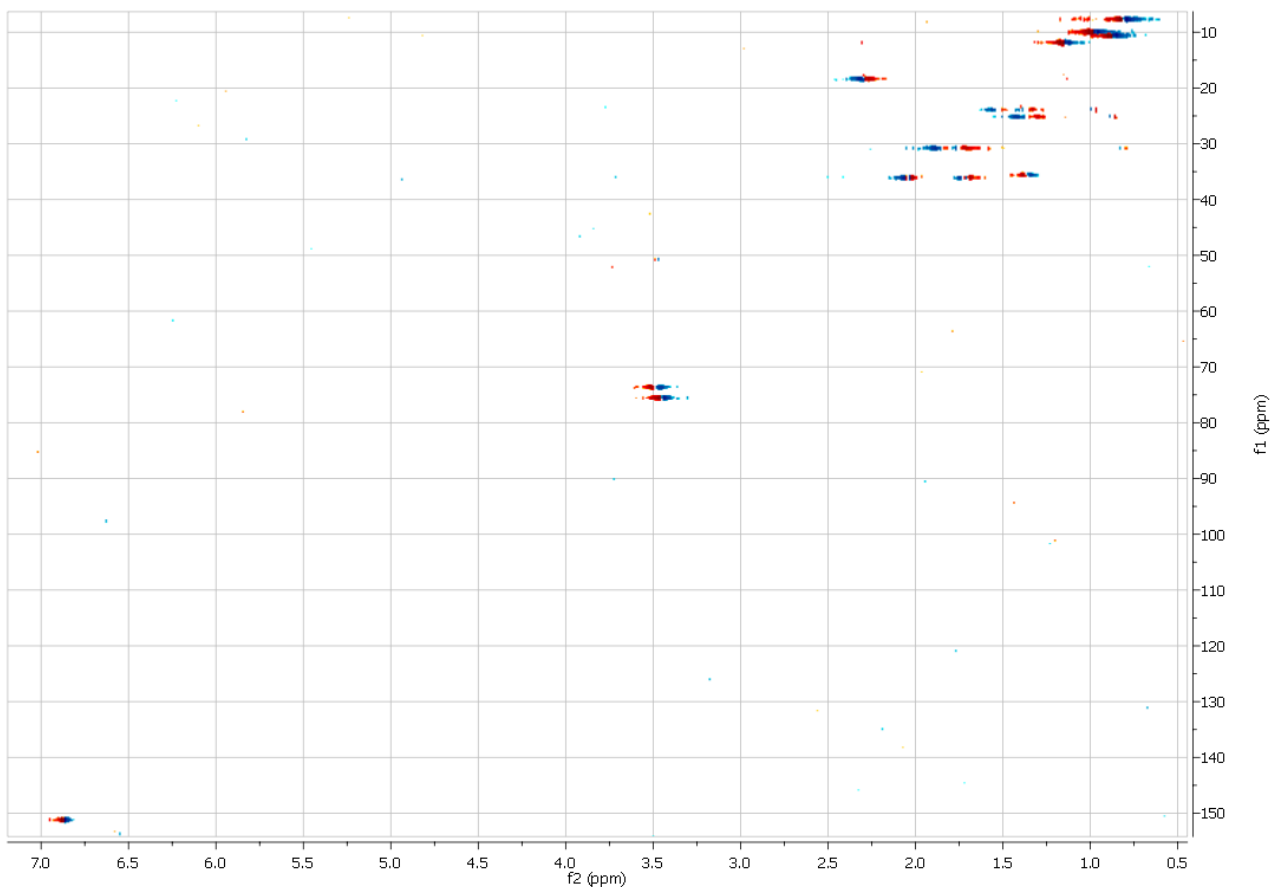

**Figure S11:** HSQC spectrum (500 MHz, CDCl<sub>3</sub>) of plakilactone G (**1**).

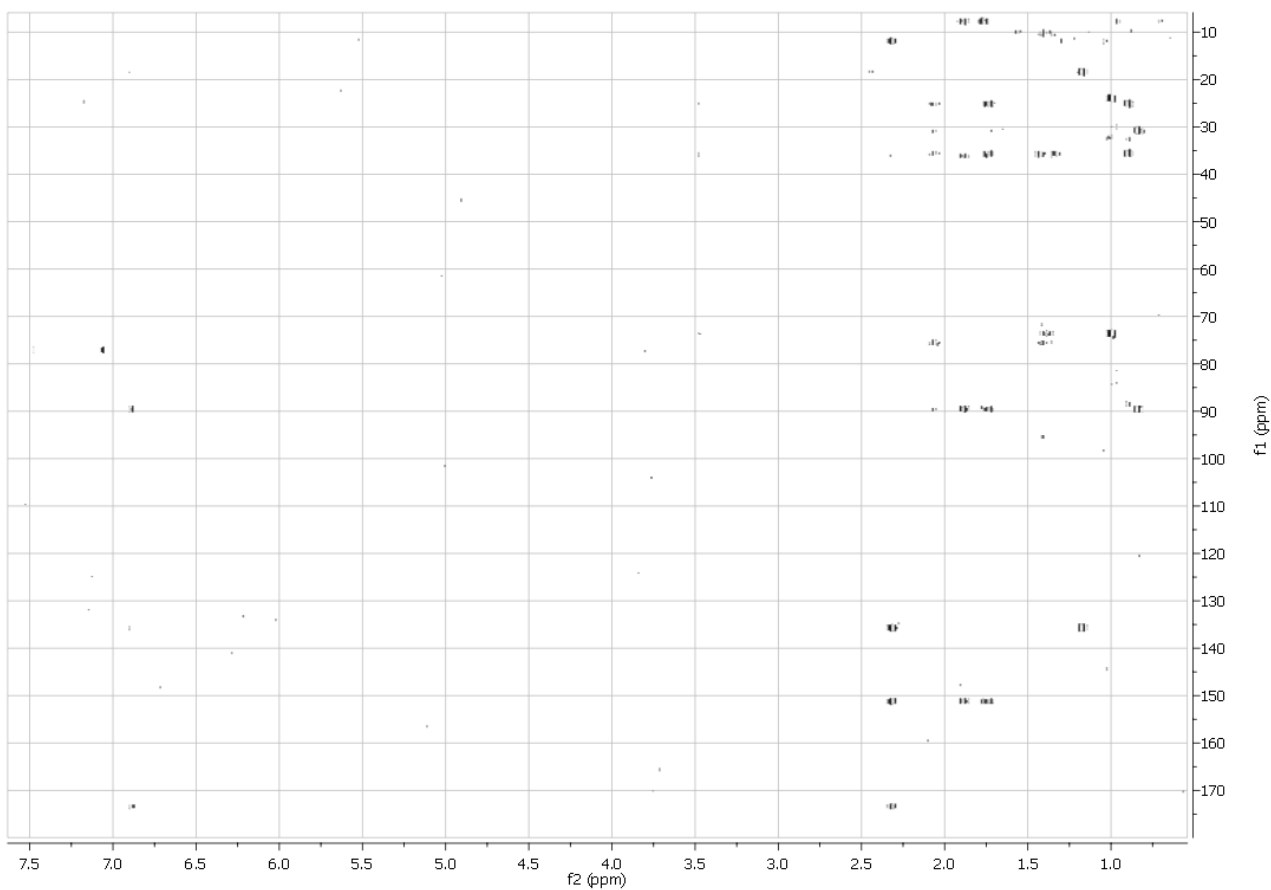

**Figure S12:** HMBC spectrum (500 MHz, CDCl<sub>3</sub>) of plakilactone G (**1**).

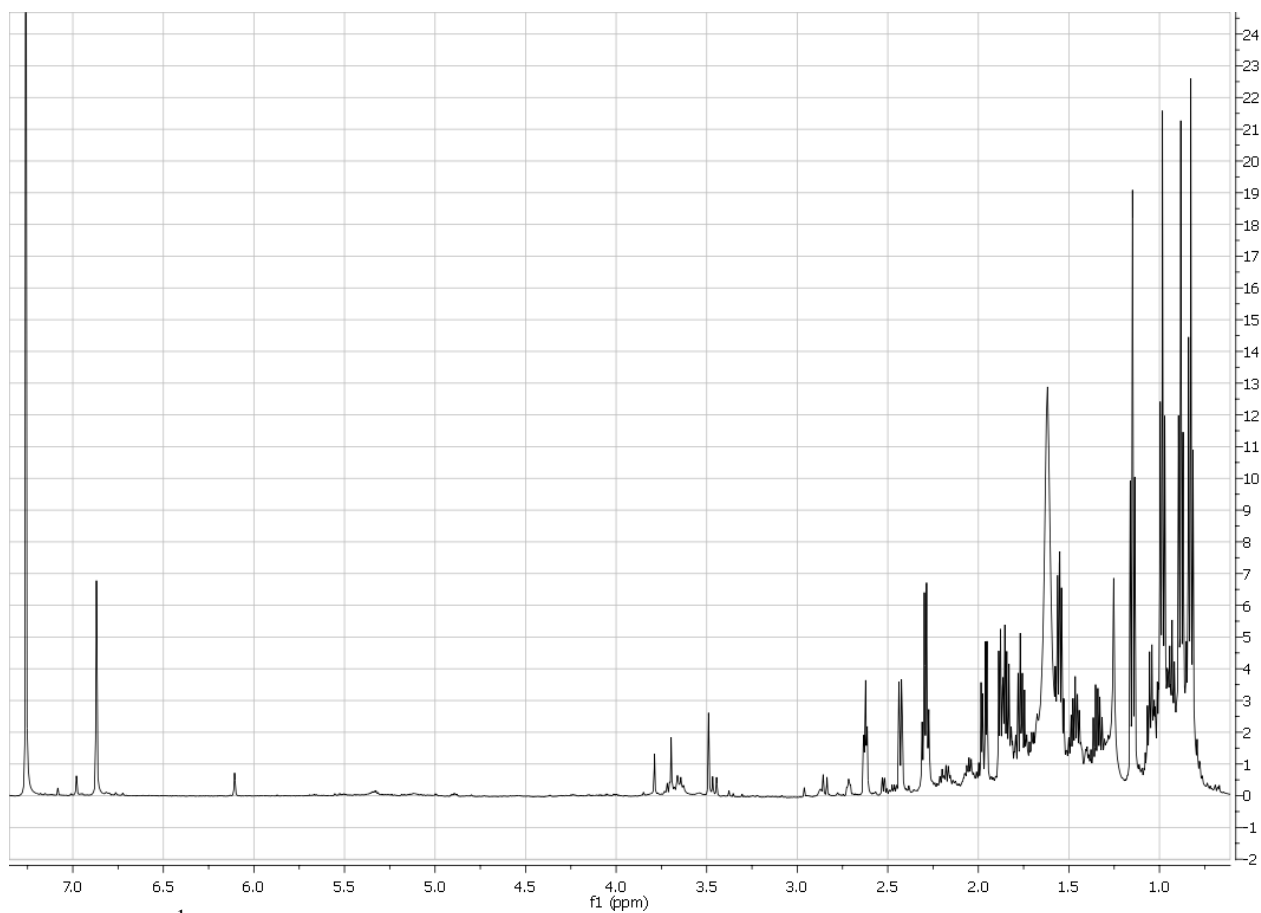

**Figure S13:**  $^1\text{H}$  NMR spectrum (600 MHz,  $\text{CDCl}_3$ ) of plakilactone H (**2**).

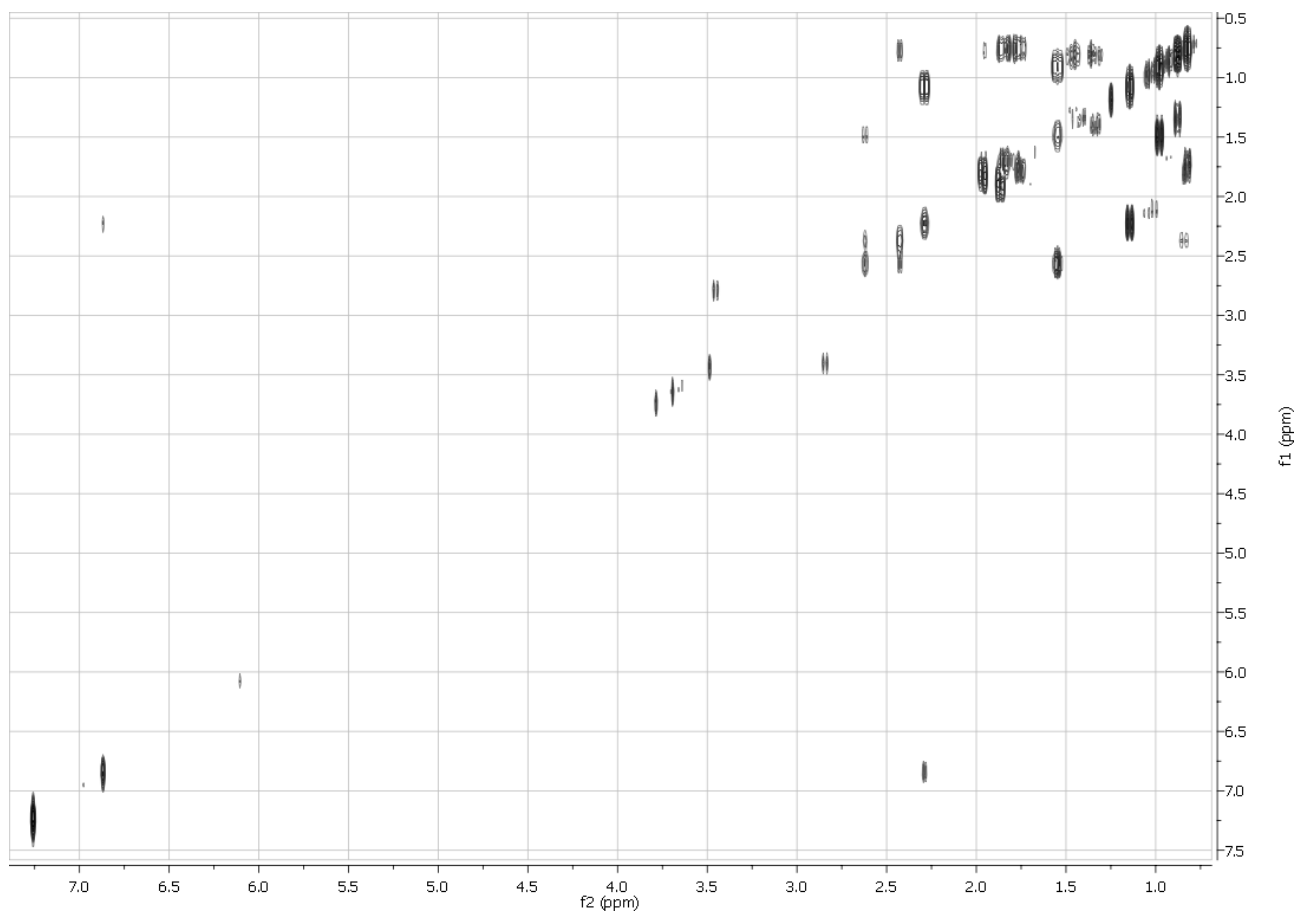

**Figure S14:** COSY spectrum (600 MHz,  $\text{CDCl}_3$ ) of plakilactone H (**2**).

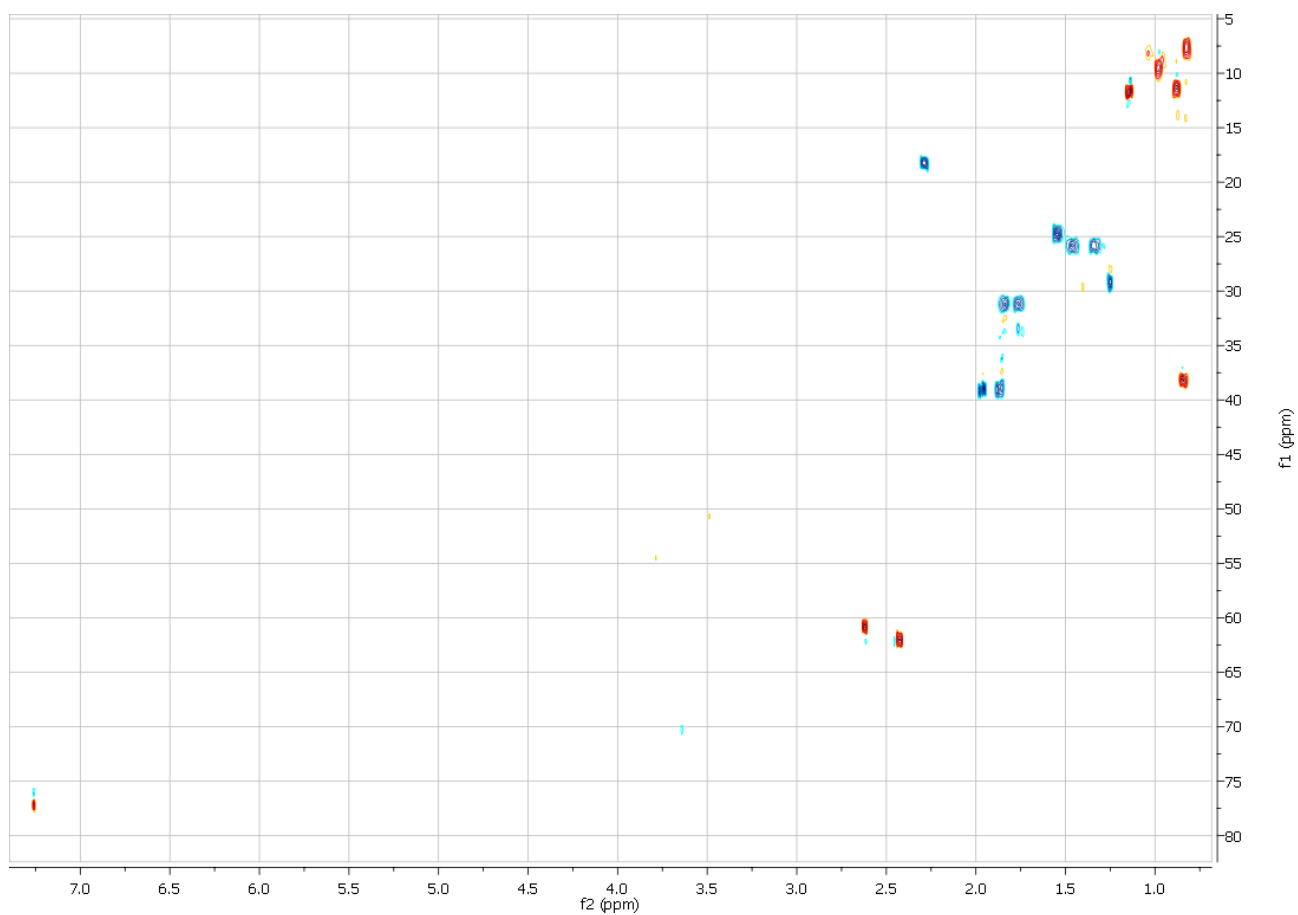

**Figure S15:** HSQC spectrum (600 MHz, CDCl<sub>3</sub>) of plakilactone H (2).

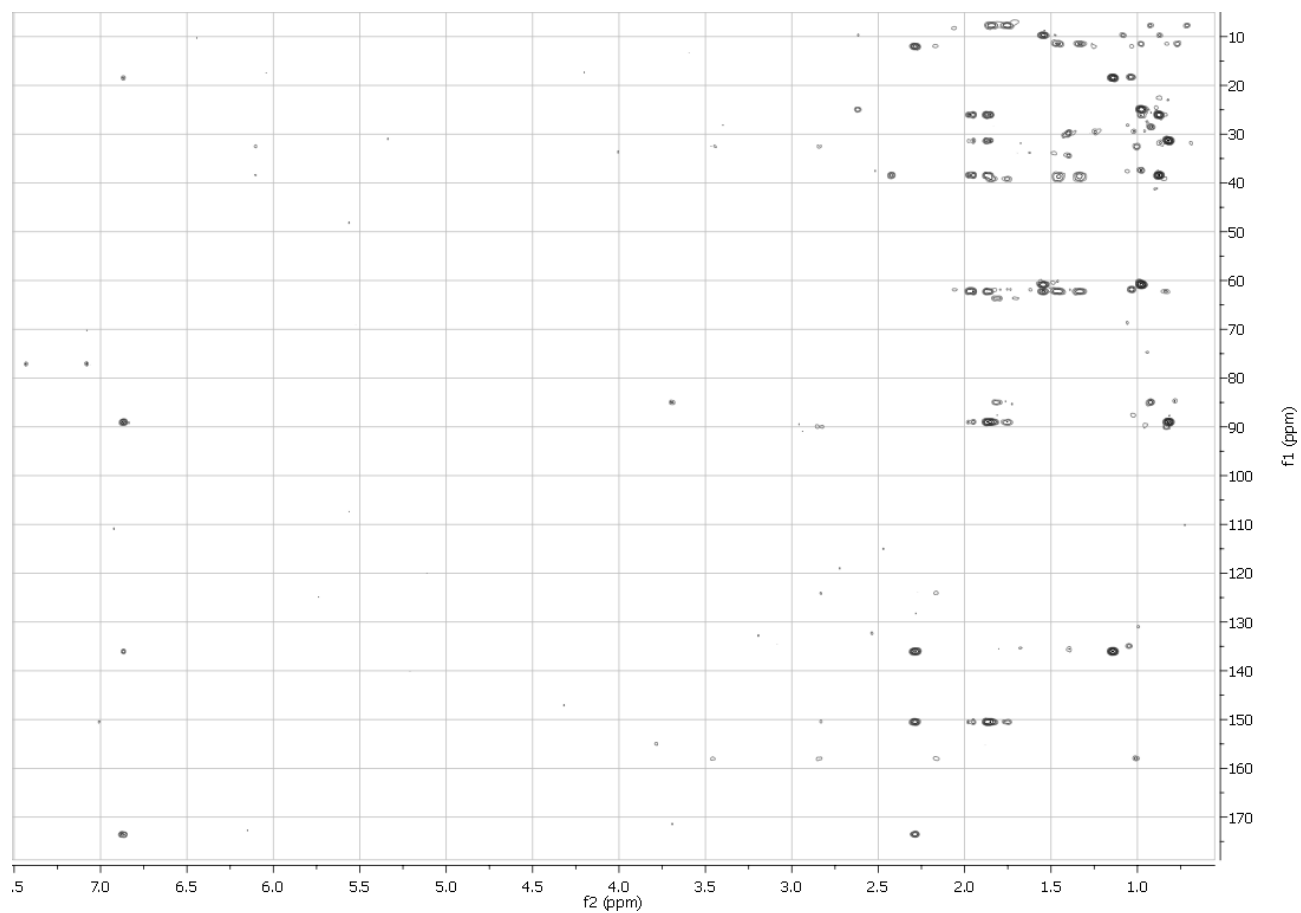

**Figure S16:** HMBC spectrum (600 MHz, CDCl<sub>3</sub>) of plakilactone H (2).

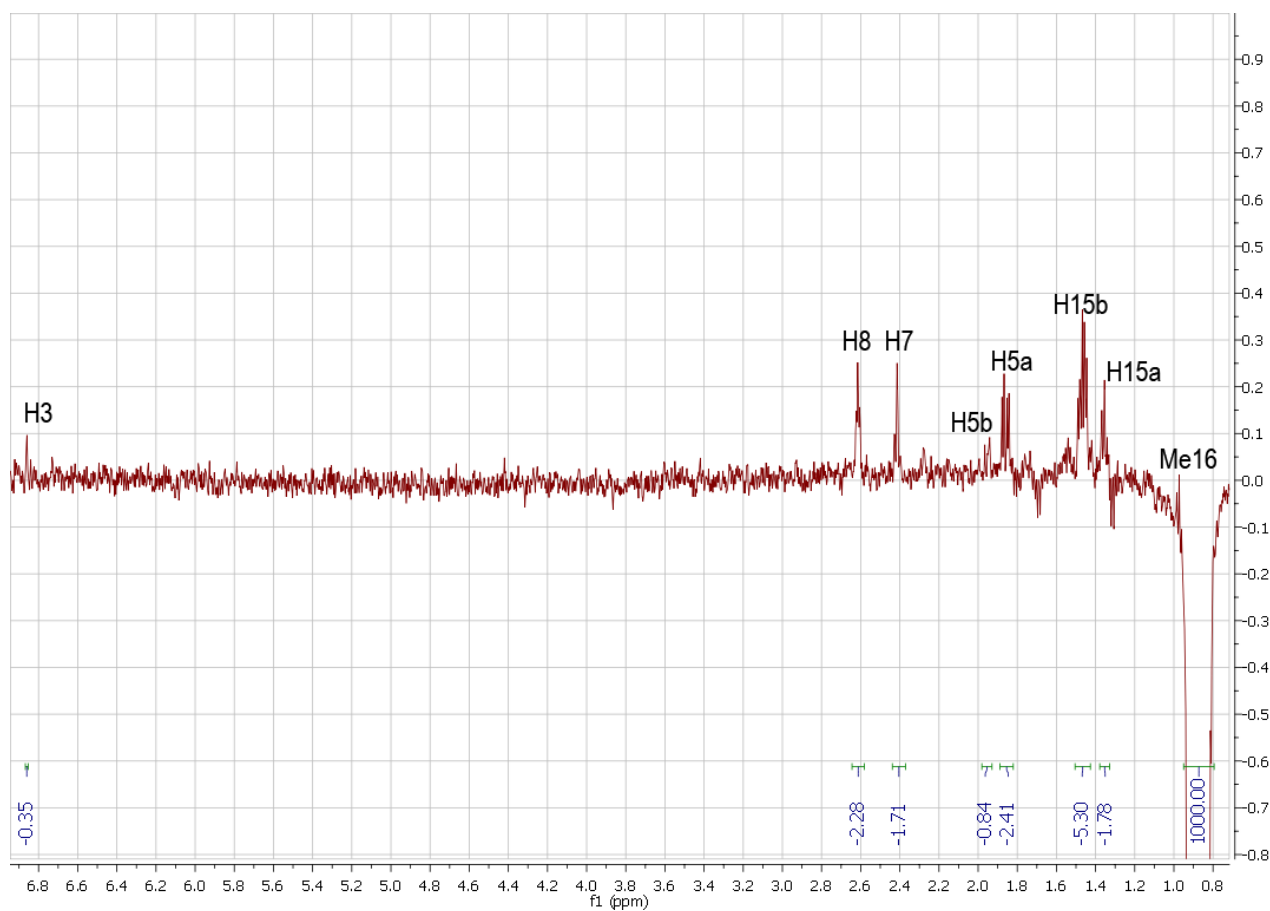

**Figure S17:** Selective 1D-NOESY spectrum (600 MHz,  $\text{CDCl}_3$ ) of Me16 of plakilactone H (**2**).

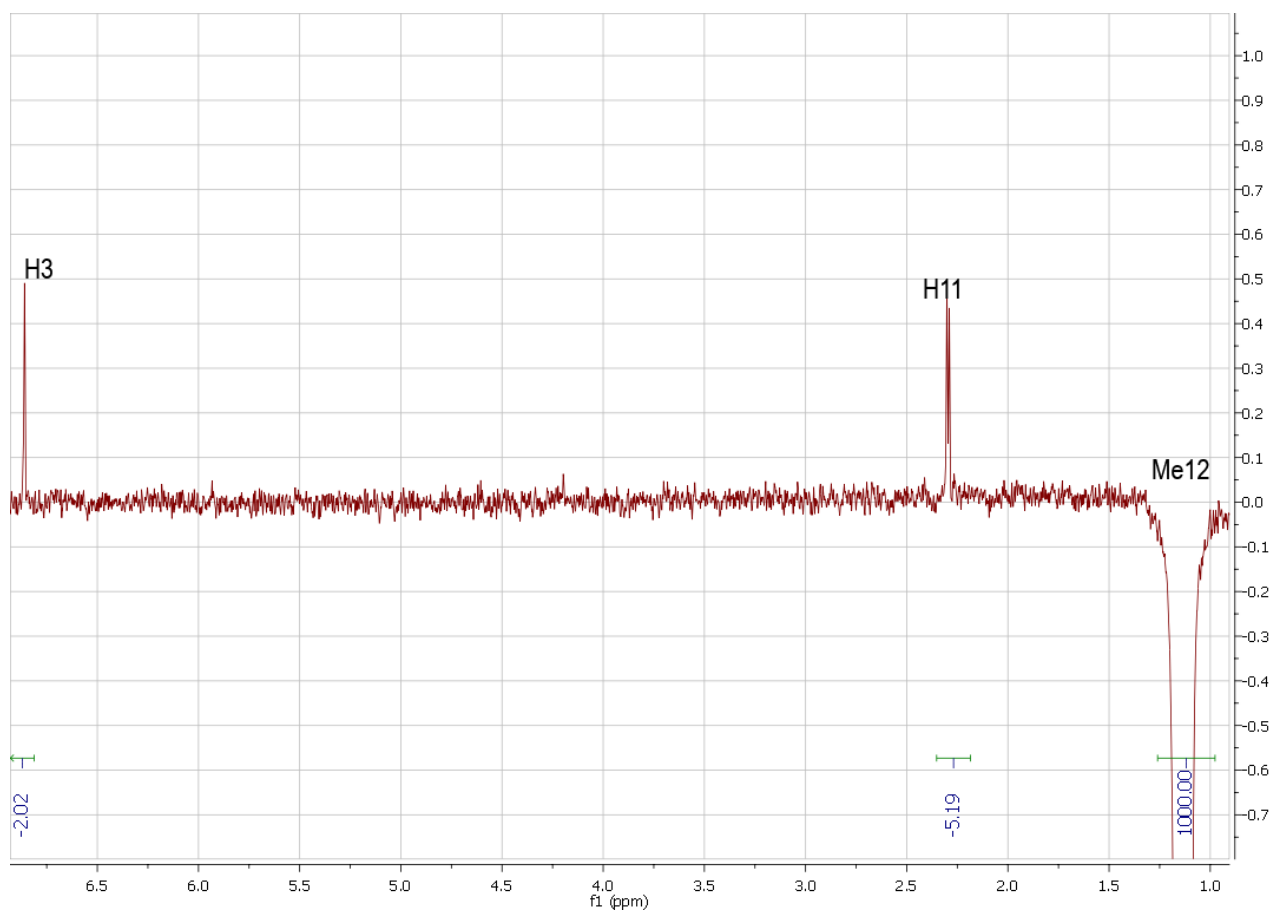

**Figure S18:** Selective 1D-NOESY spectrum (600 MHz,  $\text{CDCl}_3$ ) of Me12 of plakilactone H (**2**).

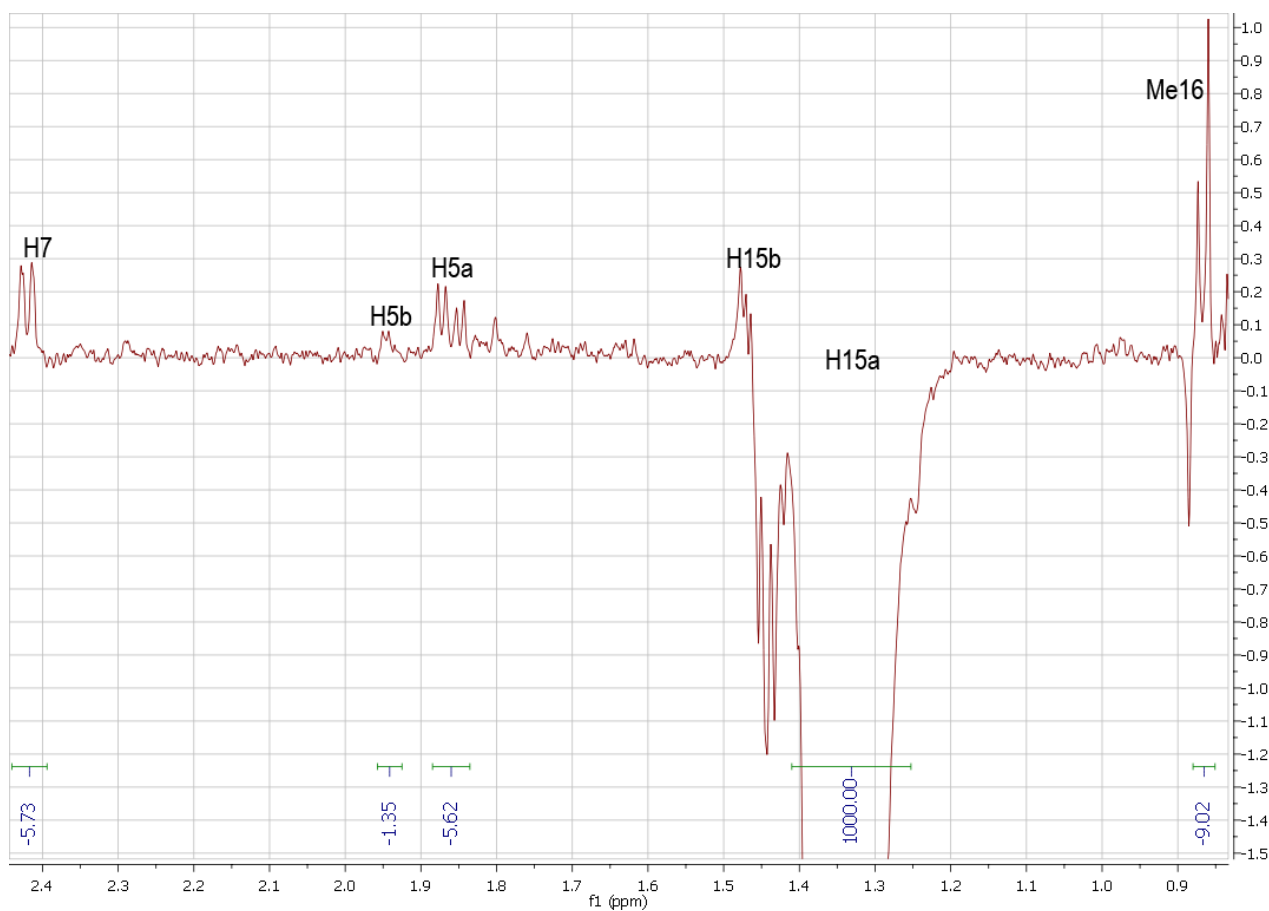

**Figure S19:** Selective 1D-NOESY spectrum (600 MHz,  $\text{CDCl}_3$ ) of H15a of plakilactone H (2).

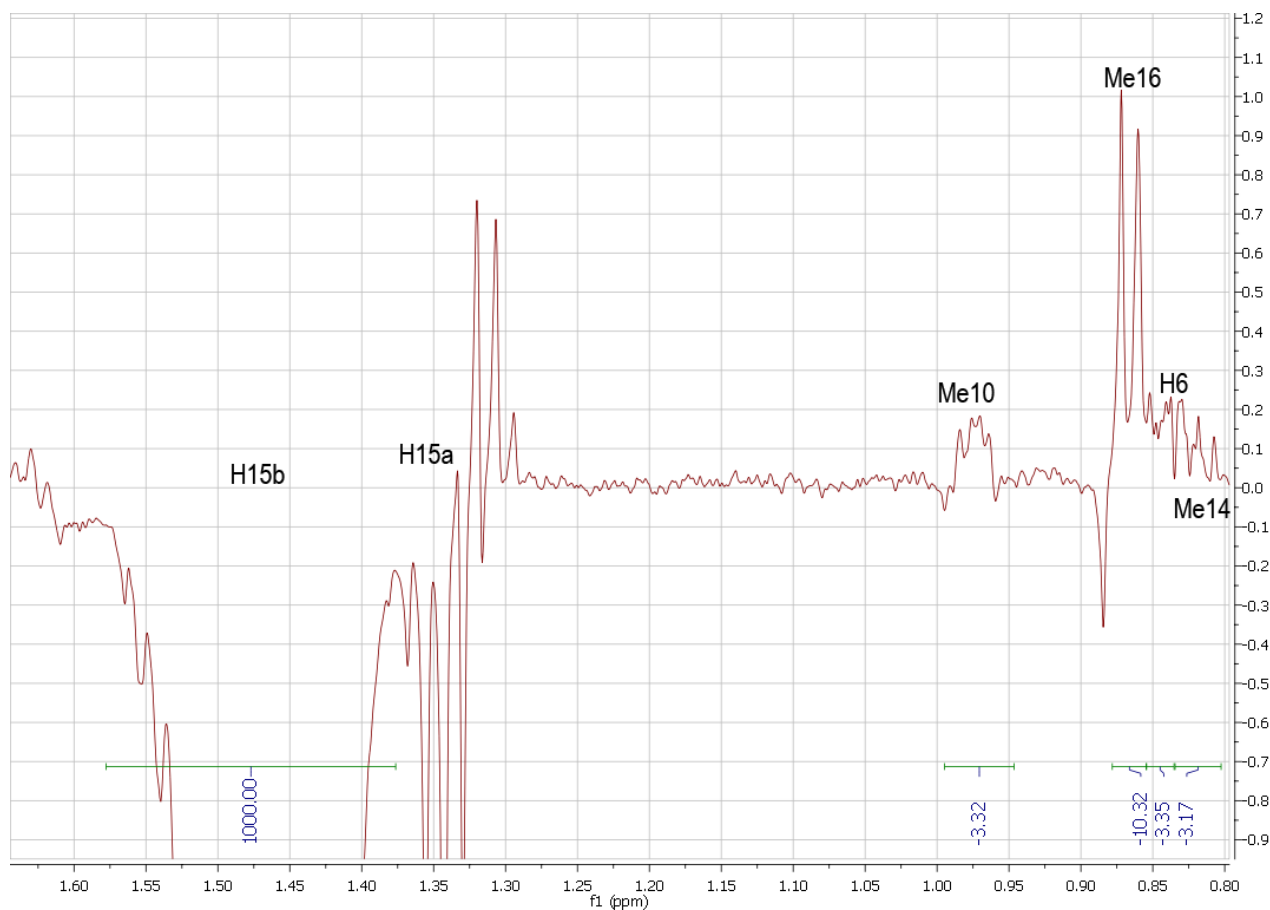

**Figure S20:** Selective 1D-NOESY spectrum (600 MHz,  $\text{CDCl}_3$ ) of H15b of plakilactone H (2).



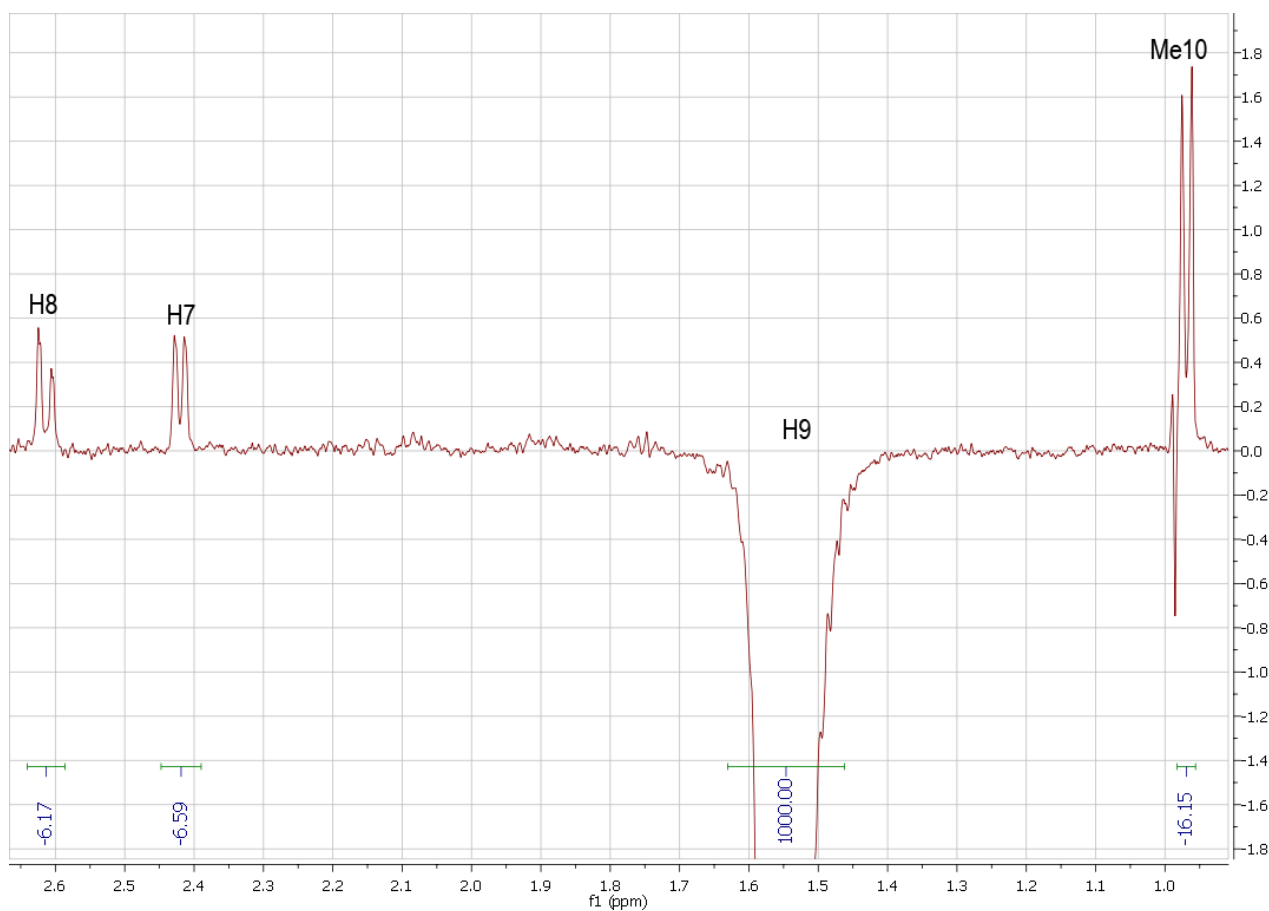

**Figure S21:** Selective 1D-NOESY spectrum (600 MHz,  $\text{CDCl}_3$ ) of H9 of plakilactone H (2).

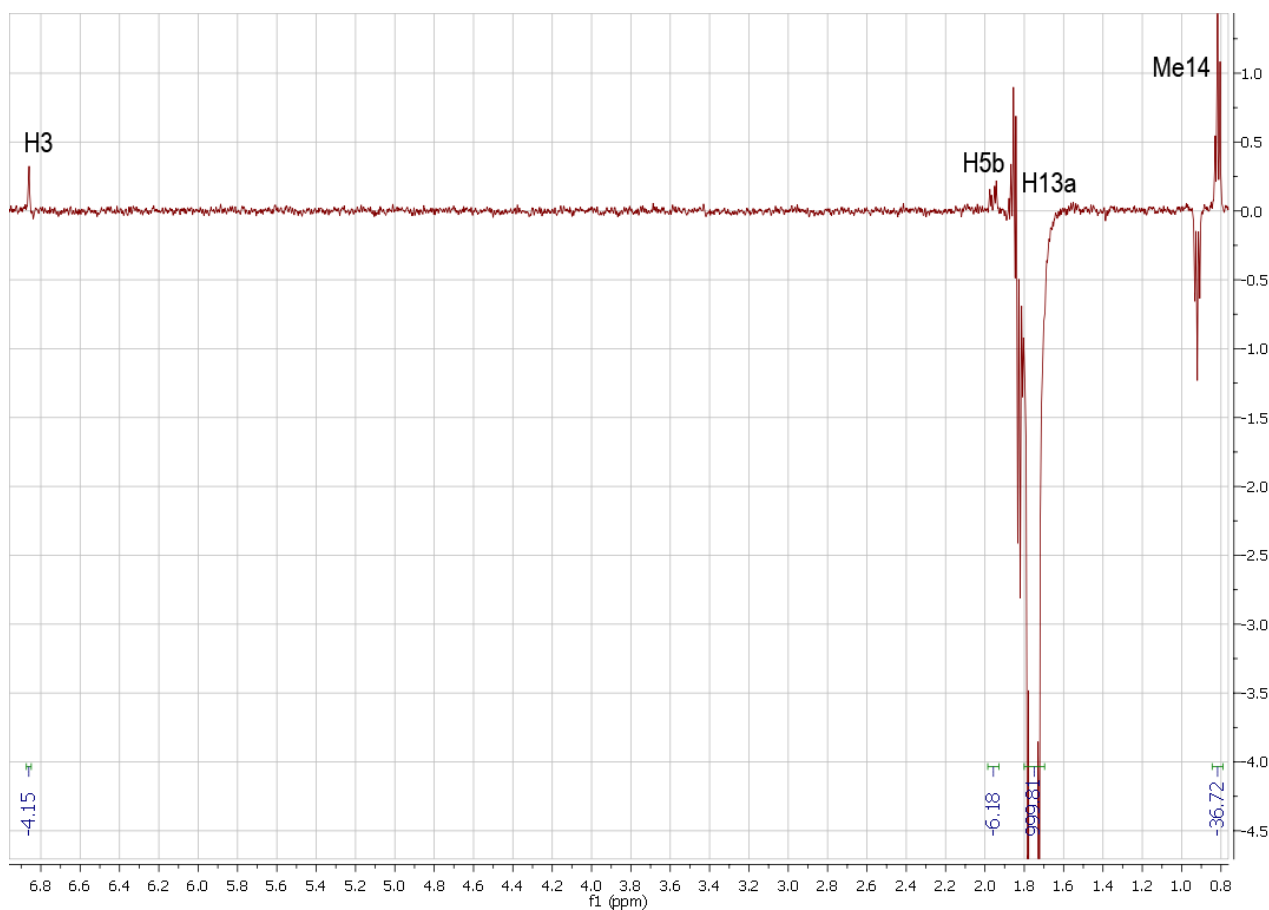

**Figure S22:** Selective 1D-NOESY spectrum (600 MHz,  $\text{CDCl}_3$ ) of H13a of plakilactone H (2).

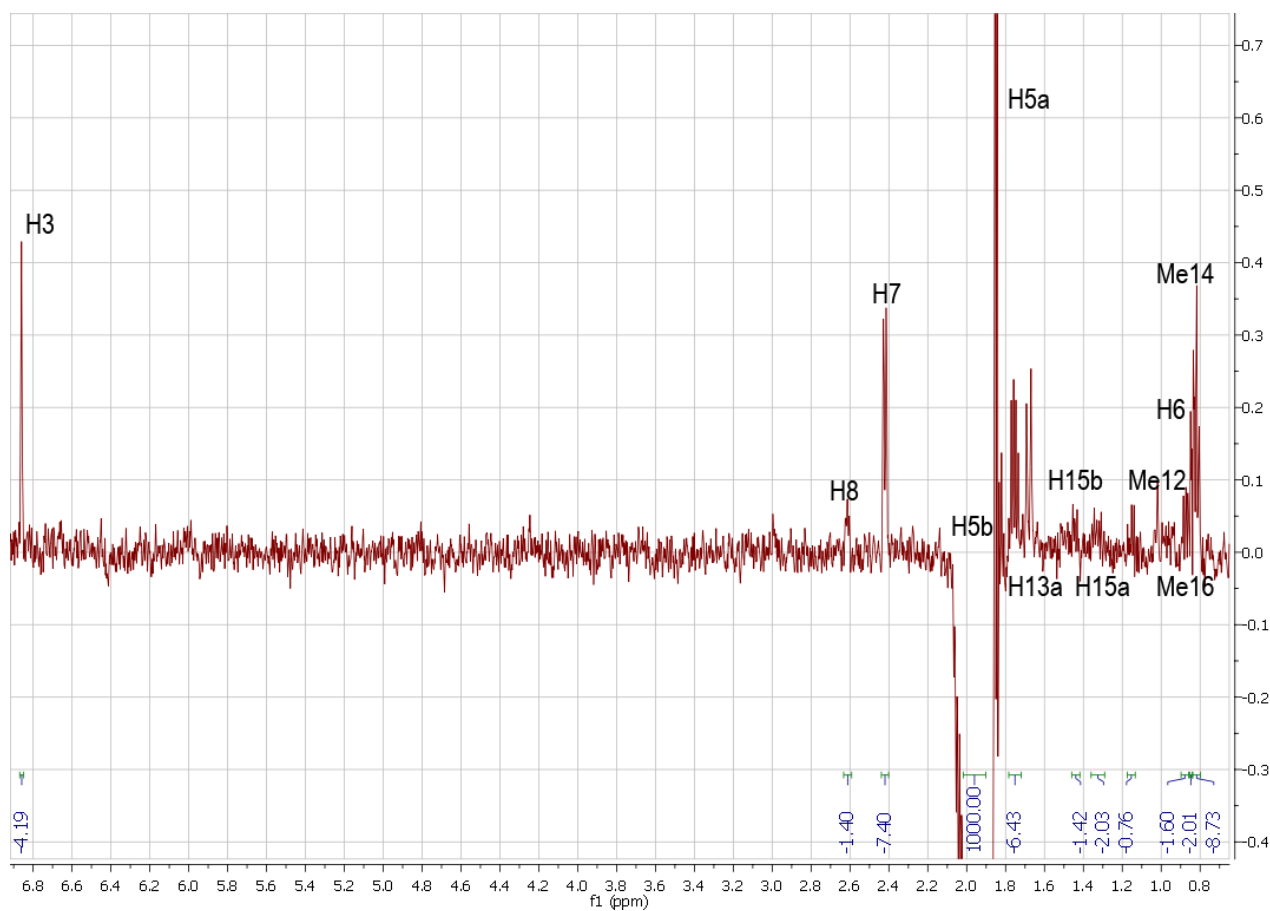

**Figure S23:** Selective 1D-NOESY spectrum (600 MHz,  $\text{CDCl}_3$ ) of H5b of plakilactone H (**2**).

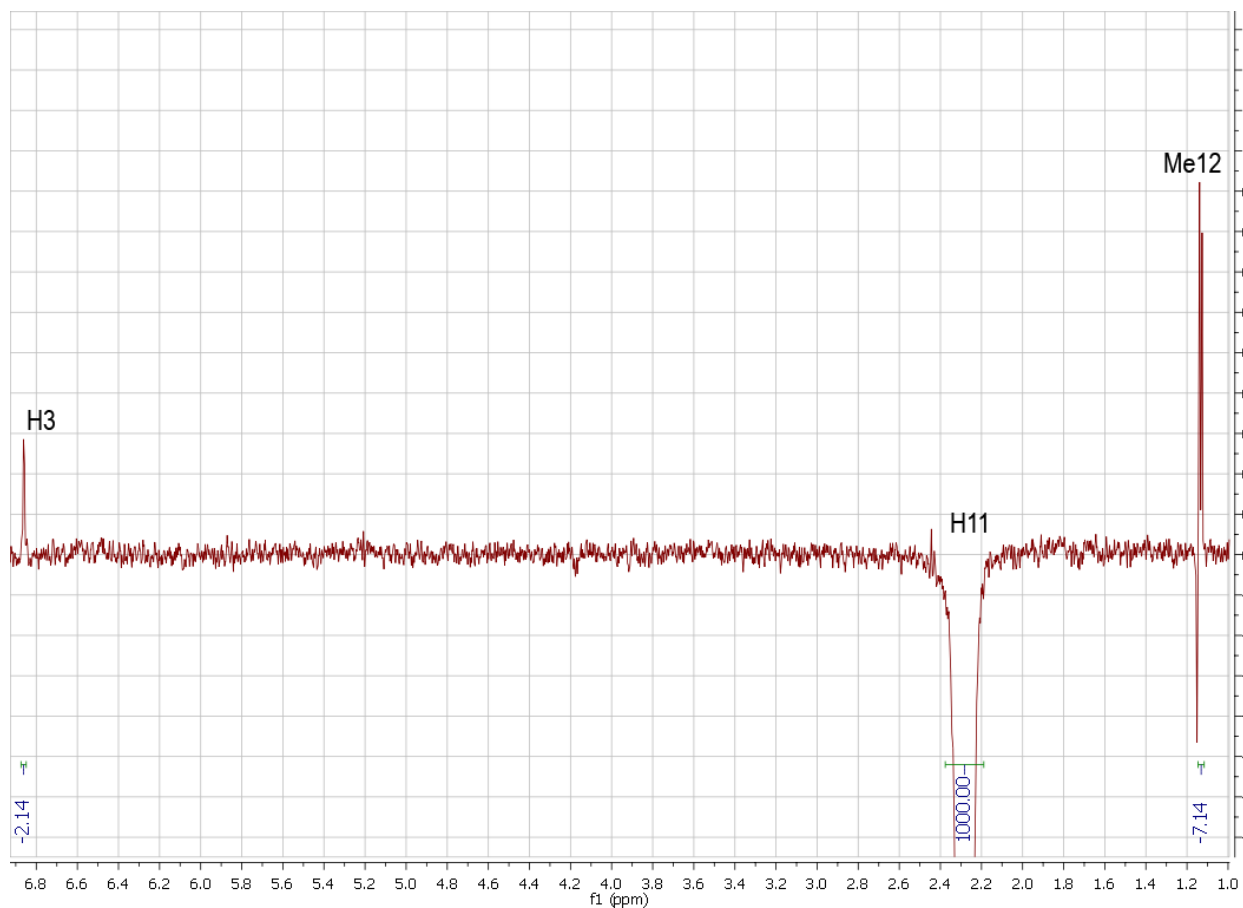

**Figure S24:** Selective 1D-NOESY spectrum (600 MHz,  $\text{CDCl}_3$ ) of H11 of plakilactone H (**2**).

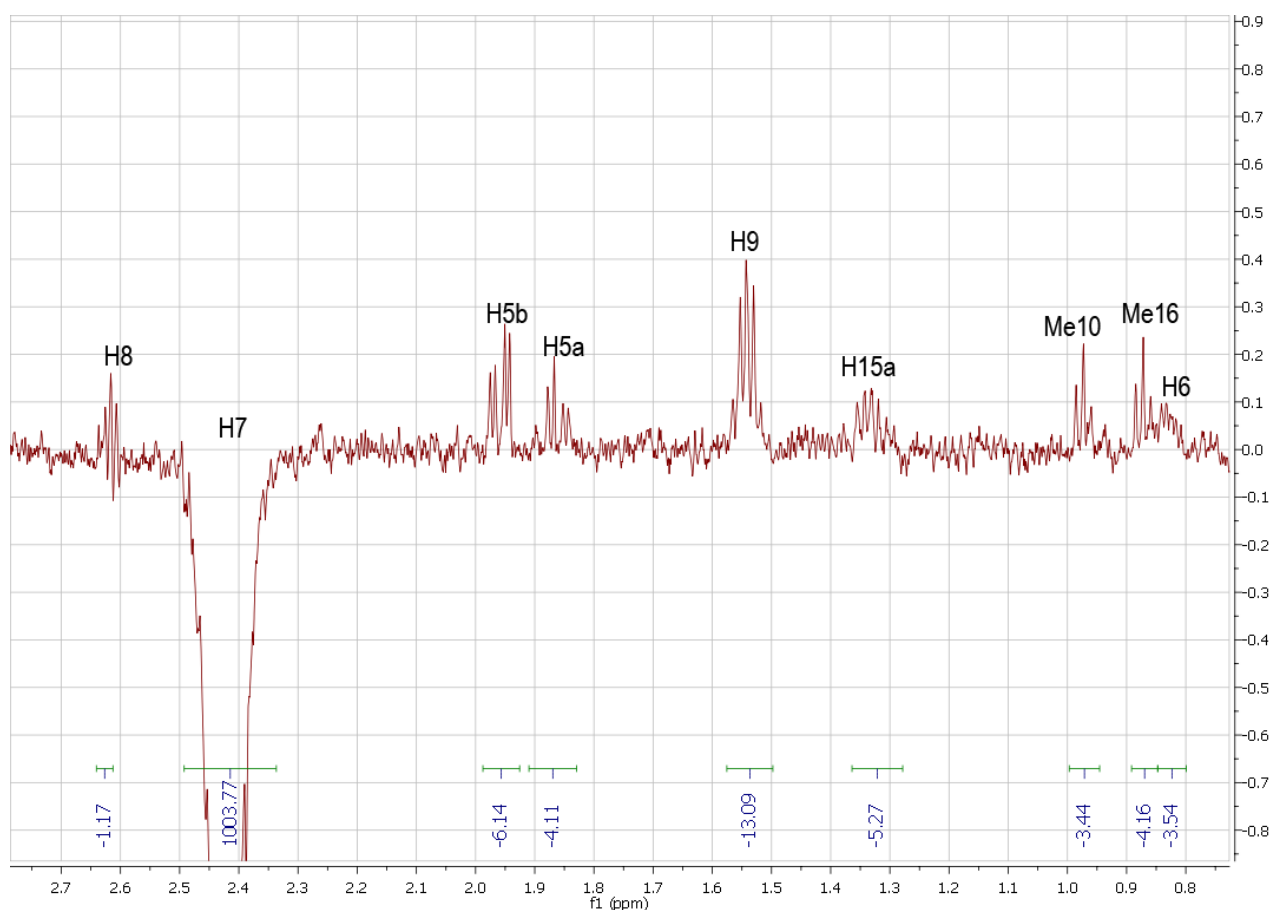

**Figure S25:** Selective 1D-NOESY spectrum (600 MHz,  $\text{CDCl}_3$ ) of H7 of plakilactone H (**2**).

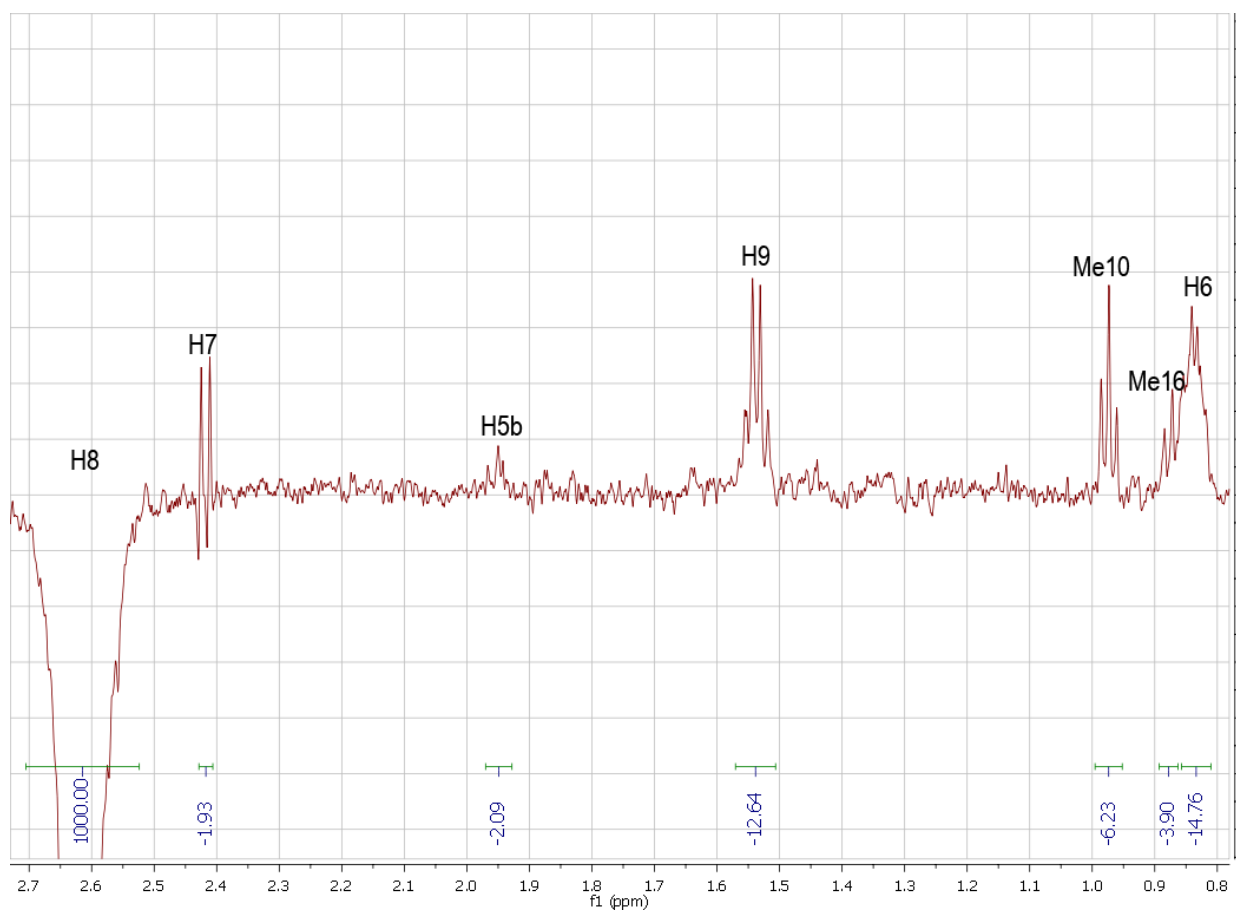

**Figure S26:** Selective 1D-NOESY spectrum (600 MHz,  $\text{CDCl}_3$ ) of H8 of plakilactone H (**2**).

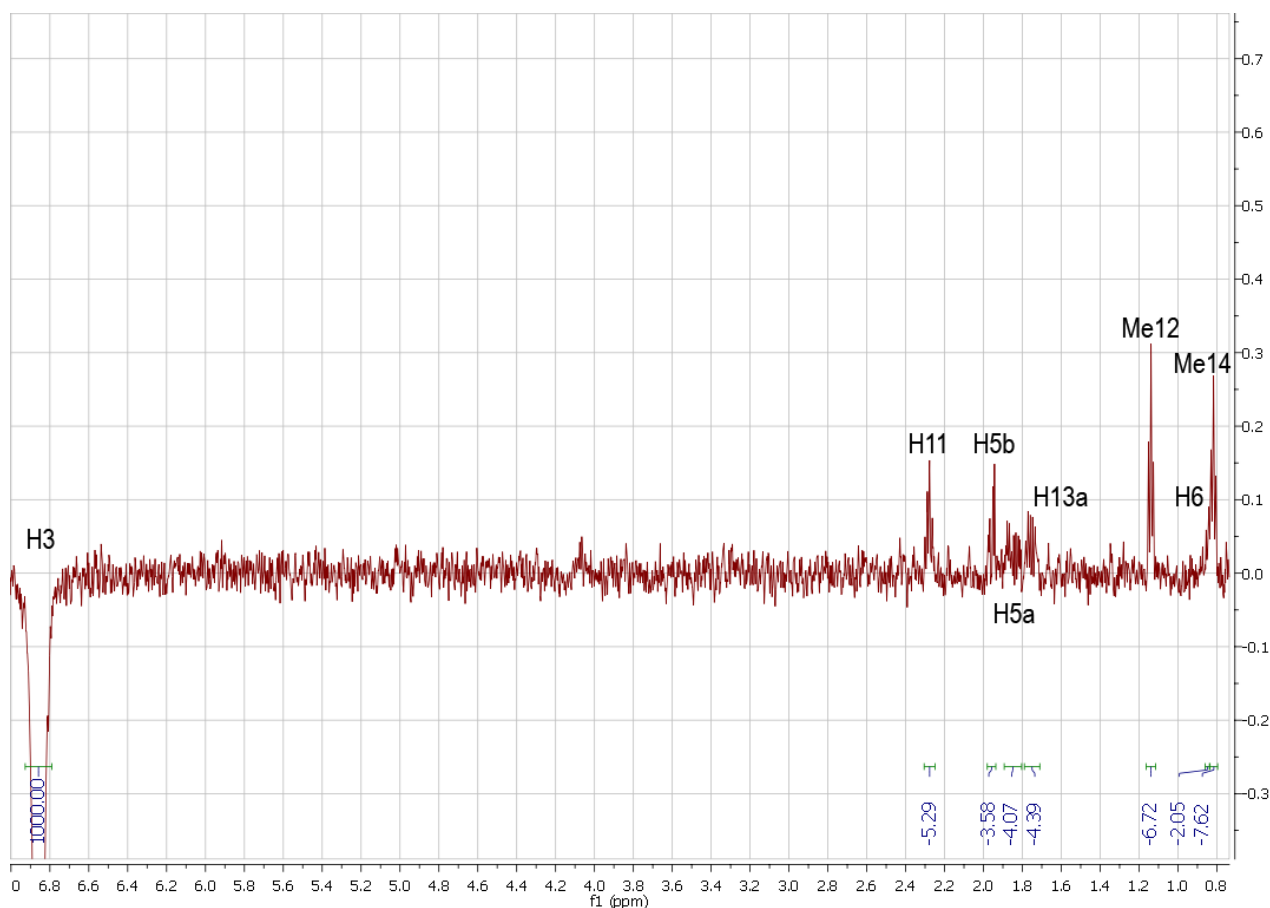

**Figure S27:** Selective 1D-NOESY spectrum (600 MHz,  $\text{CDCl}_3$ ) of H3 of plakilactone H (**2**).

**Table S2:** Experimental (in  $\text{CDCl}_3$ ) and calculated (in vacuo)  $^{13}\text{C}$  chemical shifts of diastereoisomers **2a,b,e,f**.

| carbon | $\delta_{\text{exp}}$ | <b>2a</b>              | <b>2b</b>              | <b>2e</b>              | <b>2f</b>              |
|--------|-----------------------|------------------------|------------------------|------------------------|------------------------|
|        |                       | $\delta_{\text{calc}}$ | $\delta_{\text{calc}}$ | $\delta_{\text{calc}}$ | $\delta_{\text{calc}}$ |
| 10     | 9.7                   | 10.8                   | 9.6                    | 9.6                    | 10.8                   |
| 9      | 24.9                  | 25.7                   | 25.6                   | 26.0                   | 25.1                   |
| 8      | 60.9                  | 58.5                   | 61.0                   | 59.1                   | 62.1                   |
| 7      | 62.1                  | 59.5                   | 60.6                   | 60.5                   | 61.1                   |
| 6      | 38.3                  | 36.1                   | 37.9                   | 38.8                   | 36.4                   |
| 5      | 39.2                  | 36.7                   | 40.3                   | 40.6                   | 39.3                   |
| 4      | 89.2                  | 86.7                   | 87.5                   | 86.6                   | 87.4                   |
| 1      | 173.6                 | 169.3                  | 169.9                  | 169.2                  | 170.5                  |
| 2      | 136.1                 | 138.8                  | 139.8                  | 137.3                  | 140.4                  |
| 3      | 150.2                 | 151.0                  | 150.7                  | 153.5                  | 150.0                  |
| 11     | 18.3                  | 20.3                   | 20.5                   | 20.4                   | 20.6                   |
| 12     | 11.8                  | 10.0                   | 10.6                   | 10.4                   | 10.5                   |
| 13     | 31.2                  | 30.7                   | 32.2                   | 29.1                   | 32.6                   |
| 14     | 7.7                   | 7.9                    | 6.9                    | 7.4                    | 6.8                    |
| 15     | 25.8                  | 28.2                   | 27.1                   | 27.1                   | 26.1                   |
| 16     | 11.4                  | 10.0                   | 11.4                   | 10.1                   | 8.9                    |

**Table S3:** Experimental (in CDCl<sub>3</sub>) and calculated (in vacuo) <sup>13</sup>C chemical shifts of diastereoisomers **1a–d**.

| carbon | <b>1a</b>             |                        | <b>1b</b>              |                        | <b>1c</b>              |                        | <b>1d</b>              |                        |
|--------|-----------------------|------------------------|------------------------|------------------------|------------------------|------------------------|------------------------|------------------------|
|        | $\delta_{\text{exp}}$ | $\delta_{\text{calc}}$ | $\delta_{\text{calc}}$ | $\delta_{\text{calc}}$ | $\delta_{\text{calc}}$ | $\delta_{\text{calc}}$ | $\delta_{\text{calc}}$ | $\delta_{\text{calc}}$ |
| 10     | 10.1                  | 10.0                   | 10.3                   | 10.6                   | 10.2                   |                        |                        |                        |
| 9      | 24.0                  | 21.6                   | 26.2                   | 27.5                   | 22.1                   |                        |                        |                        |
| 8      | 73.6                  | 72.4                   | 74.5                   | 73.1                   | 70.7                   |                        |                        |                        |
| 7      | 75.6                  | 76.1                   | 71.8                   | 79.3                   | 76.5                   |                        |                        |                        |
| 6      | 35.6                  | 36.0                   | 37.2                   | 34.2                   | 34.0                   |                        |                        |                        |
| 5      | 36.2                  | 39.2                   | 37.0                   | 37.5                   | 37.0                   |                        |                        |                        |
| 4      | 89.6                  | 87.1                   | 87.2                   | 88.8                   | 87.5                   |                        |                        |                        |
| 1      | 173.4                 | 169.0                  | 169.5                  | 172.1                  | 169.2                  |                        |                        |                        |
| 2      | 135.7                 | 137.8                  | 137.5                  | 140.7                  | 140.4                  |                        |                        |                        |
| 3      | 151.2                 | 153.2                  | 153.7                  | 151.4                  | 151.5                  |                        |                        |                        |
| 11     | 18.5                  | 20.8                   | 20.9                   | 20.6                   | 20.7                   |                        |                        |                        |
| 12     | 12.0                  | 11.1                   | 11.3                   | 11.4                   | 11.0                   |                        |                        |                        |
| 13     | 30.9                  | 30.3                   | 28.2                   | 32.2                   | 32.6                   |                        |                        |                        |
| 14     | 7.8                   | 7.3                    | 7.3                    | 7.2                    | 7.4                    |                        |                        |                        |
| 15     | 25.3                  | 24.2                   | 22.2                   | 20.4                   | 24.5                   |                        |                        |                        |
| 16     | 10.7                  | 9.6                    | 11.2                   | 11.8                   | 10.4                   |                        |                        |                        |

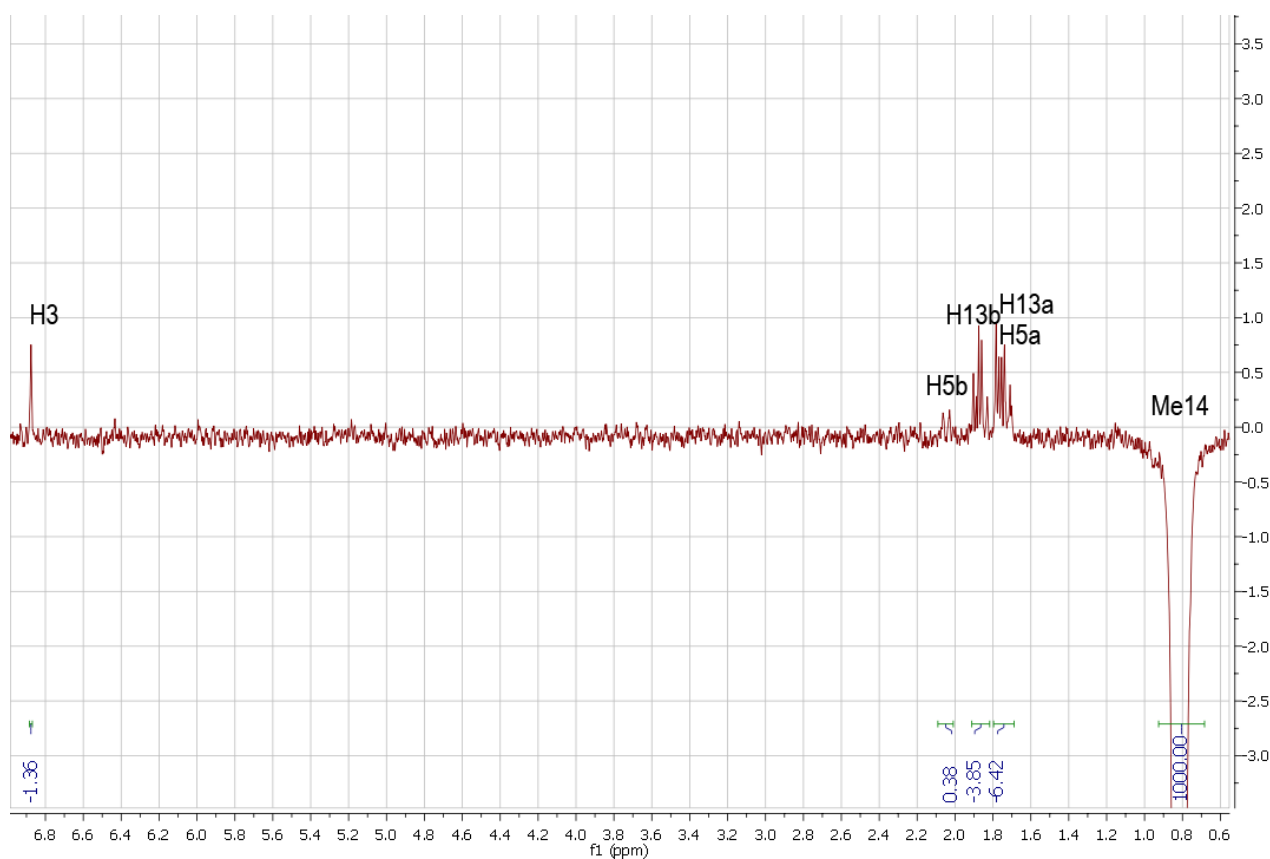

**Figure S28:** Selective 1D-NOESY spectrum (500 MHz, CDCl<sub>3</sub>) of Me14 of plakilactone G (**1**).

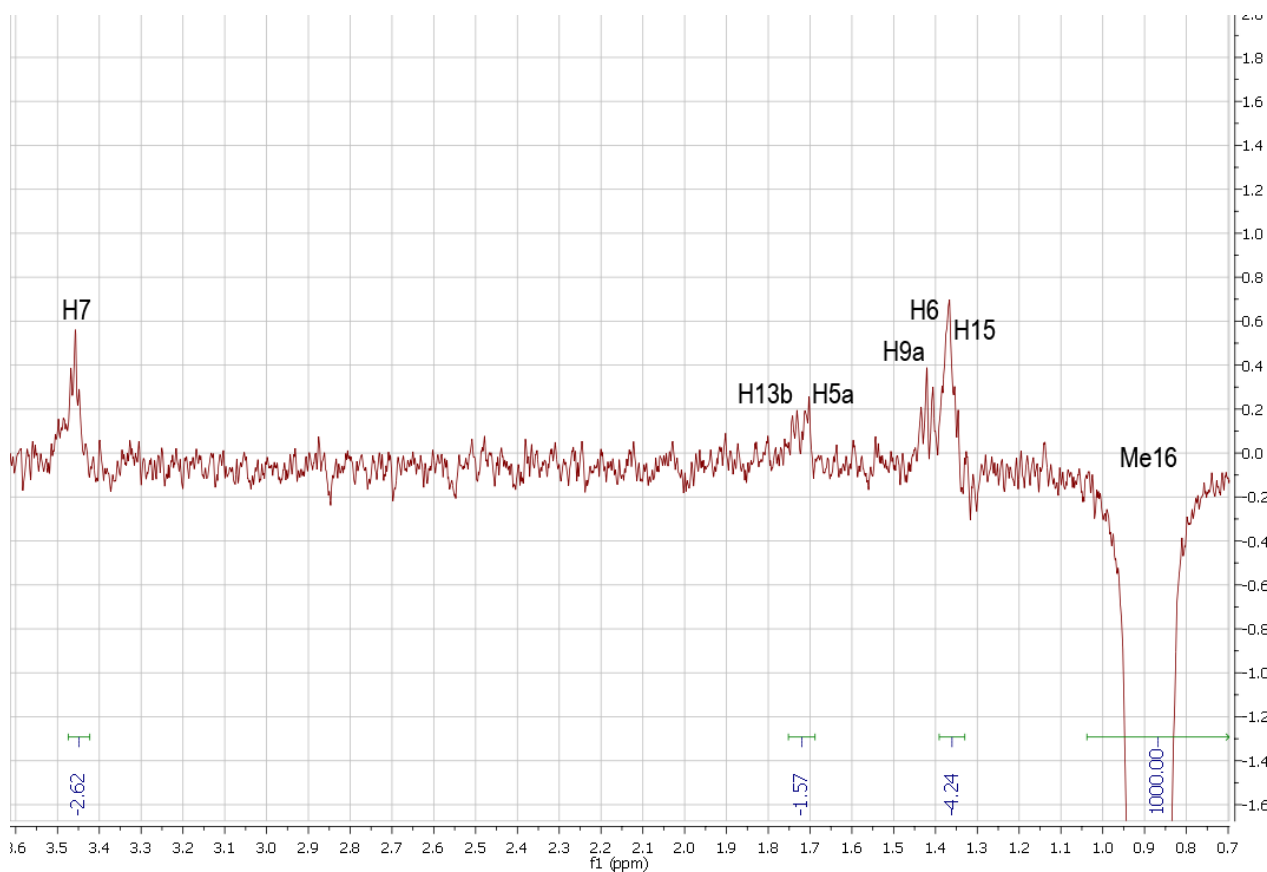

**Figure S29:** Selective 1D-NOESY spectrum (500 MHz,  $\text{CDCl}_3$ ) of Me16 of plakilactone G (**1**).

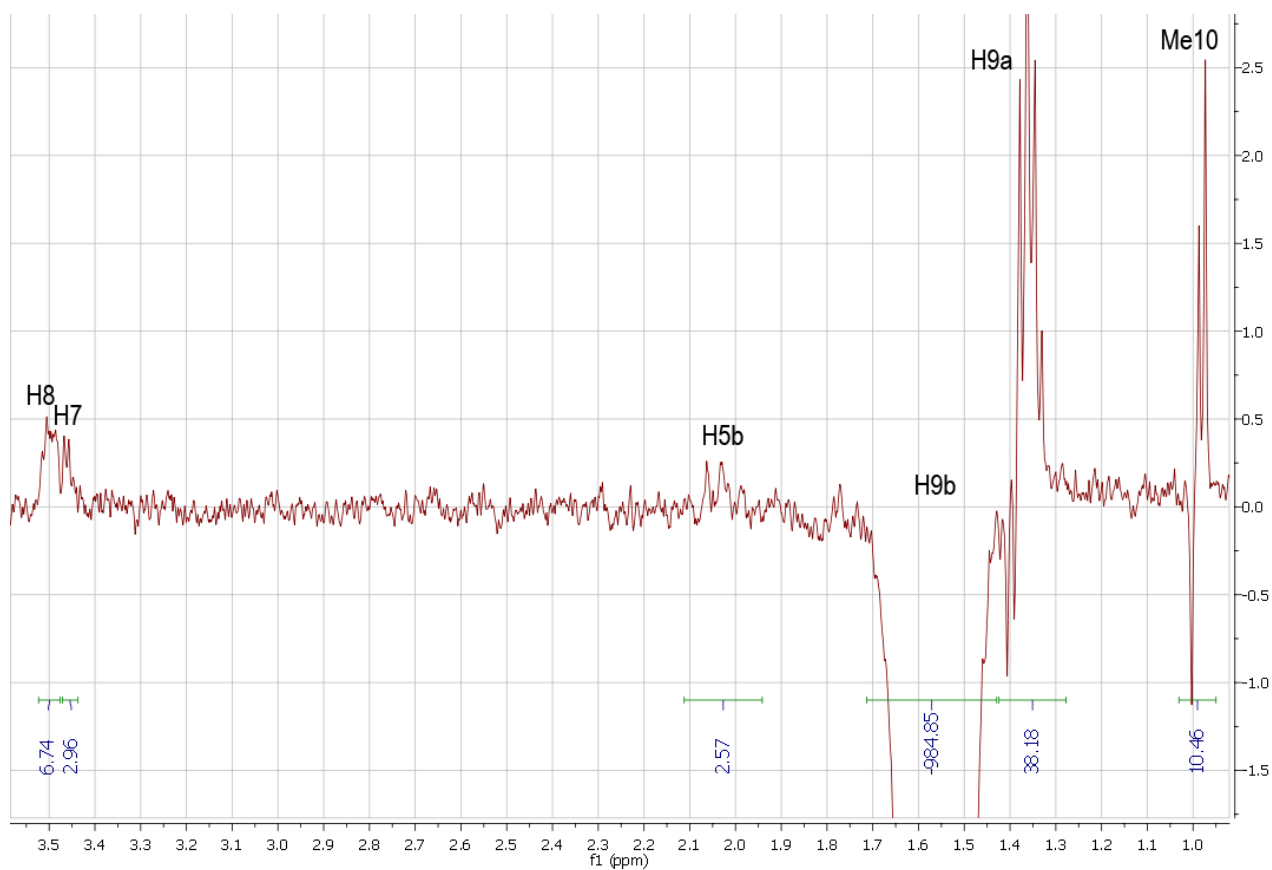

**Figure S30:** Selective 1D-NOESY spectrum (500 MHz,  $\text{CDCl}_3$ ) of H9b of plakilactone G (**1**).

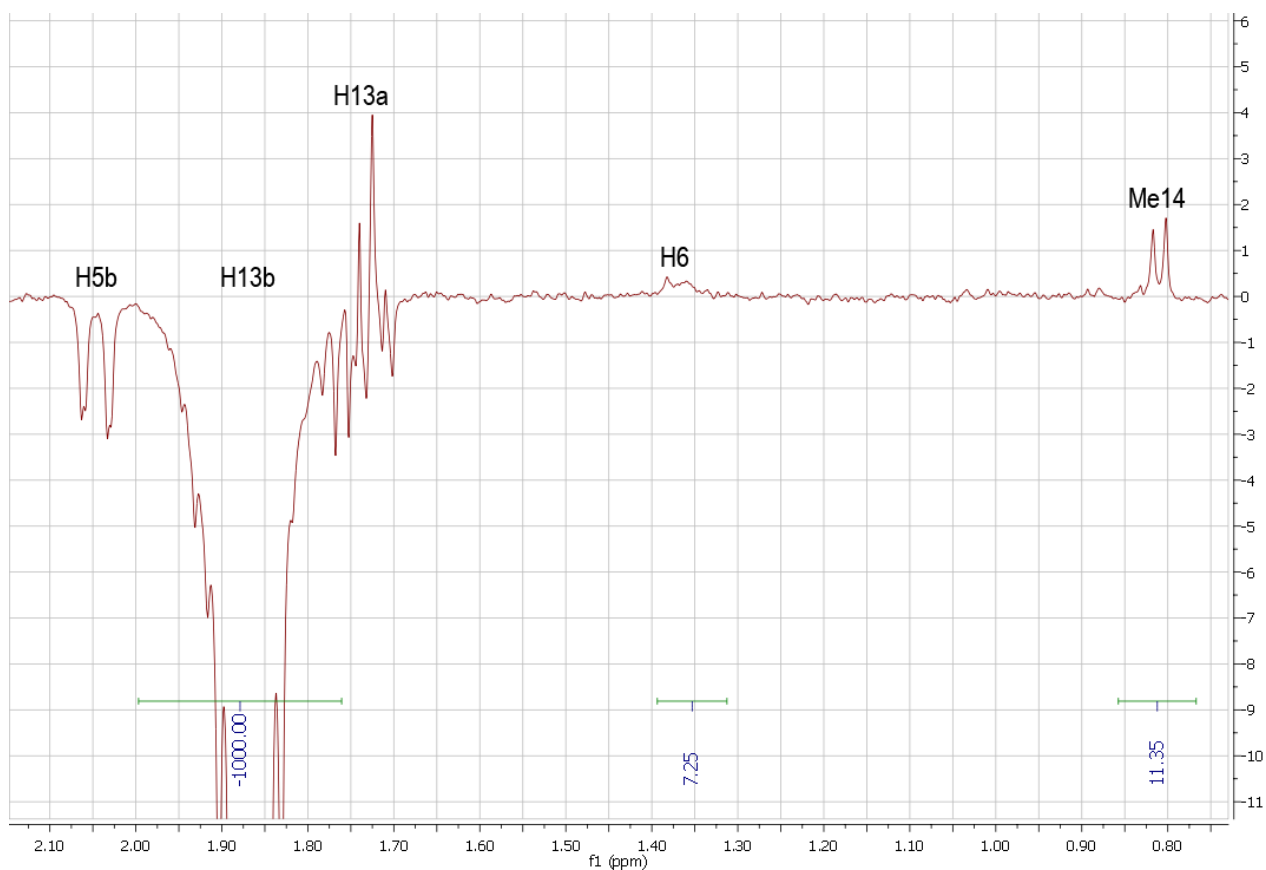

**Figure S31:** Selective 1D-NOESY spectrum (500 MHz,  $\text{CDCl}_3$ ) of H13b of plakilactone G (**1**).

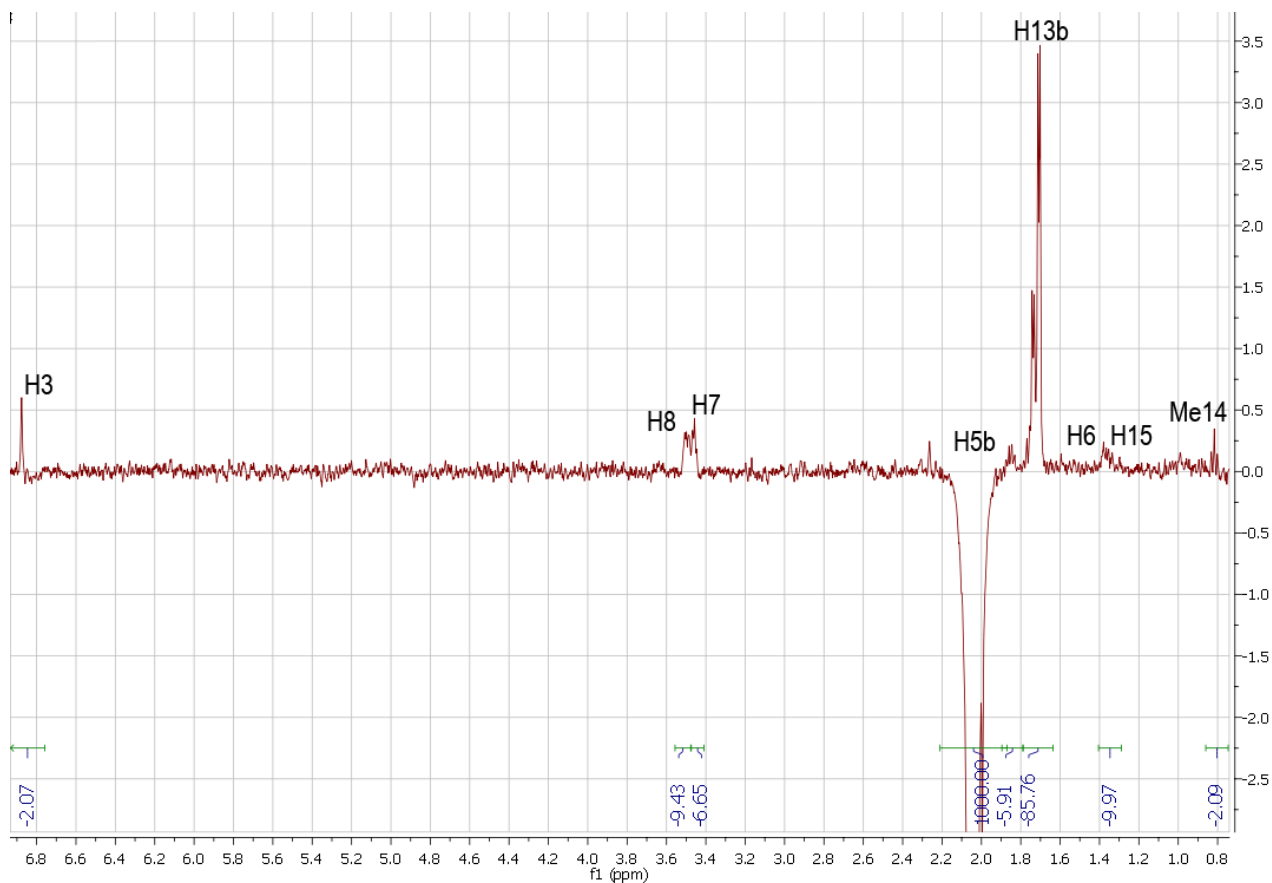

**Figure S32:** Selective 1D-NOESY spectrum (500 MHz,  $\text{CDCl}_3$ ) of H5b of plakilactone G (**1**).

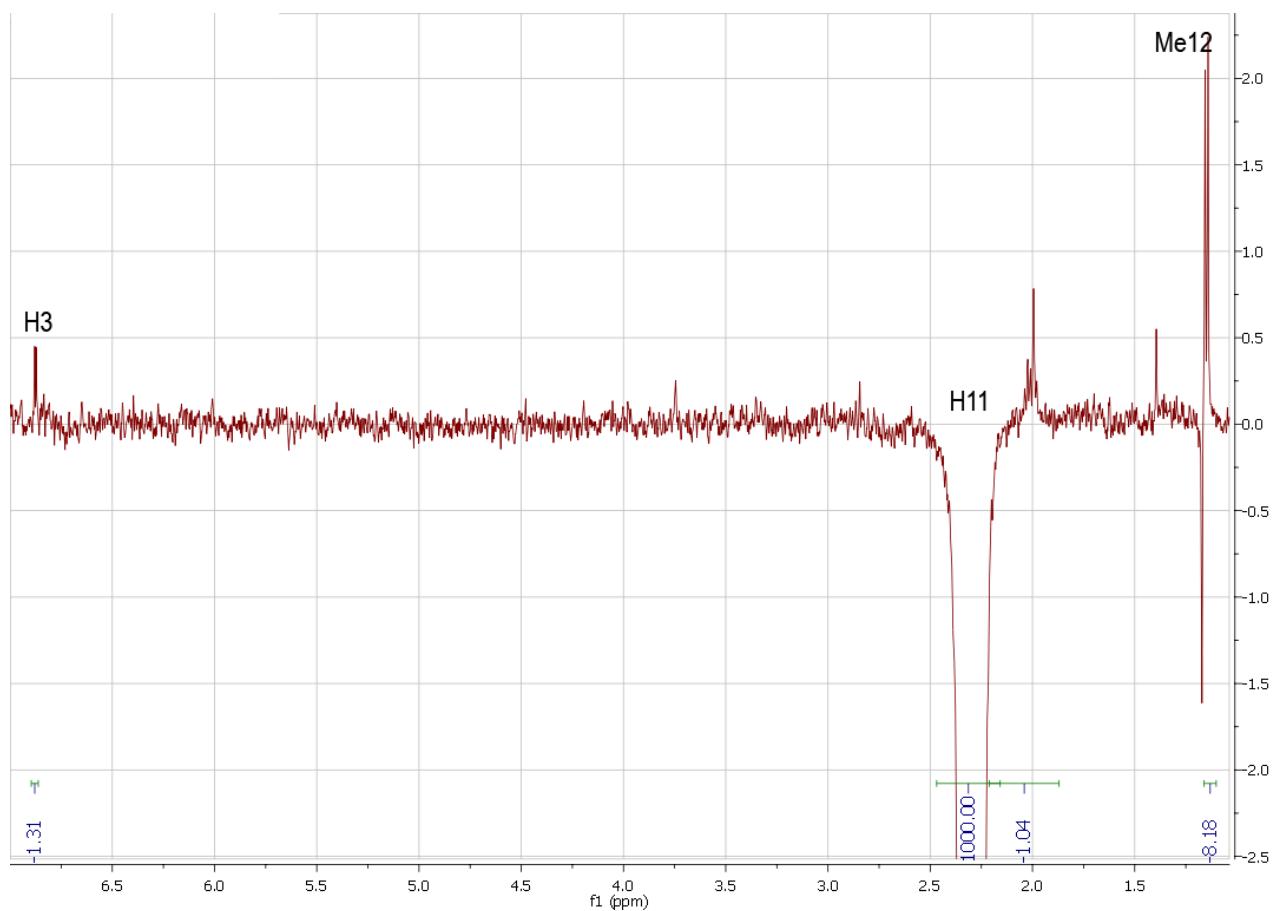

**Figure S33:** Selective 1D-NOESY spectrum (500 MHz,  $\text{CDCl}_3$ ) of H11 of plakilactone G (**1**).

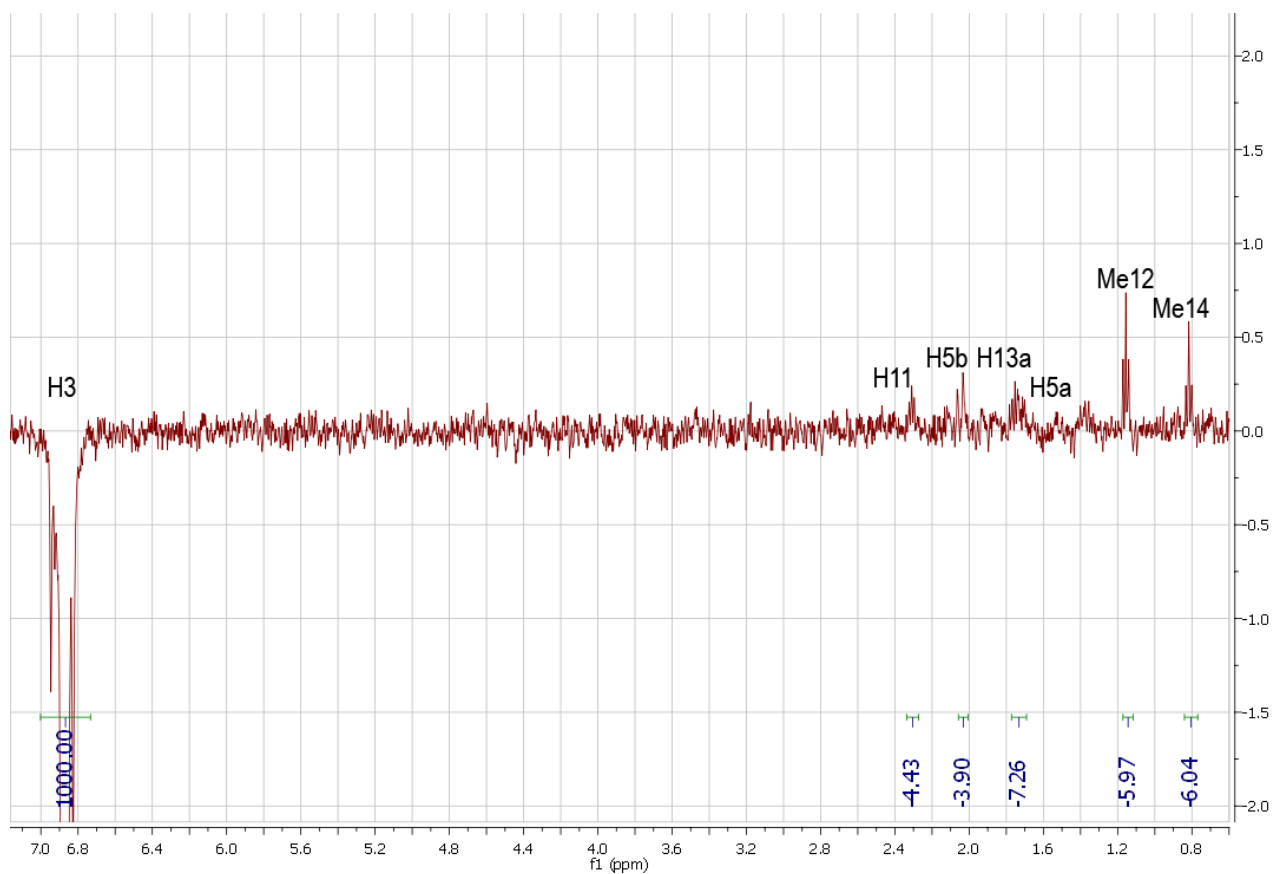

**Figure S34:** Selective 1D-NOESY spectrum (500 MHz,  $\text{CDCl}_3$ ) of H3 of plakilactone G (**1**).



**Table S4:** Comparison of inter-proton distances determined by NOEs for plakilactone G (**1**) in CDCl<sub>3</sub> with DFT-calculated value for **1a–d**. The value in bold was used to calibrate the NOEs.

| Proton     | exp<br>R <sub>NOE</sub><br>(Å) | <b>1a</b>                 |                             |                                | <b>1b</b>                 |                             |                                | <b>1c</b>                 |                             |                                | <b>1d</b>                 |                             |  |
|------------|--------------------------------|---------------------------|-----------------------------|--------------------------------|---------------------------|-----------------------------|--------------------------------|---------------------------|-----------------------------|--------------------------------|---------------------------|-----------------------------|--|
|            |                                | R <sub>calcd</sub><br>(Å) | ABS %<br>error <sup>a</sup> | exp<br>R <sub>NOE</sub><br>(Å) | R <sub>calcd</sub><br>(Å) | ABS %<br>error <sup>a</sup> | exp<br>R <sub>NOE</sub><br>(Å) | R <sub>calcd</sub><br>(Å) | ABS %<br>error <sup>a</sup> | exp<br>R <sub>NOE</sub><br>(Å) | R <sub>calcd</sub><br>(Å) | ABS %<br>error <sup>a</sup> |  |
| H5b H5a    | <b>1.69</b>                    | <b>1.76</b>               | 4%                          | <b>1.73</b>                    | <b>1.76</b>               | 0%                          | <b>1.64</b>                    | <b>1.76</b>               | 7%                          | <b>1.68</b>                    | <b>1.76</b>               | 5%                          |  |
| H5b H3     | 2.99                           | 2.94                      | 1%                          | 3.06                           | 3.13                      | 2%                          | 2.90                           | 2.77                      | 5%                          | 2.97                           | 3.84                      | 26%                         |  |
| H5b H7     | 2.59                           | 2.53                      | 2%                          | 2.65                           | 3.01                      | 13%                         | 2.51                           | 2.50                      | 1%                          | 2.57                           | 2.55                      | 1%                          |  |
| H5b H13b   | 2.64                           | 2.76                      | 4%                          | 2.70                           | 2.70                      | 0%                          | 2.56                           | 2.79                      | 9%                          | 2.62                           | 2.68                      | 2%                          |  |
| H5b H15    | 2.42                           | 2.75                      | 13%                         | 2.48                           | 2.81                      | 13%                         | 2.35                           | 2.85                      | 19%                         | 2.40                           | 2.75                      | 13%                         |  |
| H3 H11     | 3.11                           | 3.23                      | 4%                          | 3.18                           | 3.19                      | 0%                          | 3.02                           | 3.25                      | 8%                          | 3.09                           | 3.28                      | 6%                          |  |
| H3 Me12    | 3.16                           | 3.14                      | 1%                          | 3.24                           | 3.22                      | 1%                          | 3.07                           | 3.14                      | 2%                          | 3.15                           | 3.08                      | 2%                          |  |
| H3 Me14    | 3.16                           | 3.31                      | 5%                          | 3.23                           | 3.22                      | 0%                          | 3.06                           | 3.35                      | 9%                          | 3.14                           | 3.29                      | 5%                          |  |
| H11 Me12   | 3.00                           | 2.62                      | 13%                         | 3.07                           | 2.62                      | 16%                         | 2.91                           | 2.63                      | 10%                         | 2.98                           | 2.63                      | 13%                         |  |
| H13b H6    | 2.55                           | 2.88                      | 12%                         | 2.61                           | 2.74                      | 5%                          | 2.47                           | 4.56                      | 59%                         | 2.53                           | 4.38                      | 54%                         |  |
| H13b Me14  | 2.84                           | 2.62                      | 8%                          | 2.91                           | 2.62                      | 10%                         | 2.75                           | 2.63                      | 5%                          | 2.82                           | 2.62                      | 7%                          |  |
| H9b H8     | 2.80                           | 3.03                      | 8%                          | 2.87                           | 2.85                      | 1%                          | 2.72                           | 3.04                      | 11%                         | 2.78                           | 3.06                      | 9%                          |  |
| H9b H9a    | 1.87                           | 1.76                      | 6%                          | 2.06                           | 1.76                      | 8%                          | 1.81                           | 1.76                      | 3%                          | 2.00                           | 1.76                      | 5%                          |  |
| H9b Me10   | 3.15                           | 2.62                      | 18%                         | 3.22                           | 2.63                      | 20%                         | 3.05                           | 2.63                      | 15%                         | 3.13                           | 2.62                      | 18%                         |  |
| Me16 H7    | 3.02                           | 3.01                      | 0%                          | 3.09                           | 4.25                      | 32%                         | 2.93                           | 4.61                      | 44%                         | 3.00                           | 3.12                      | 4%                          |  |
| <b>MAE</b> |                                |                           | <b>6.8%</b>                 |                                |                           | <b>8.1%</b>                 |                                |                           | <b>13.8%</b>                |                                |                           | <b>11.3%</b>                |  |
| <b>STD</b> |                                |                           | <b>8.8%</b>                 |                                |                           | <b>12.5%</b>                |                                |                           | <b>19.9%</b>                |                                |                           | <b>17.0%</b>                |  |

<sup>a</sup>|% error| = |R<sub>calcd</sub> - R<sub>NOE</sub>| / [(R<sub>calcd</sub> + R<sub>NOE</sub>)/2], absolute differences for calculated versus NOE-derived distances/calculated distances.

<sup>b</sup>MAE = Σ[%error]/n.
